# Supplementary material for: Kinetic analysis of ASIC1a delineates conformational signaling from proton-sensing domains to the channel gate
Source: eLife. 2021 Mar 17;10:e66488. doi: 10.7554/eLife.66488 (PMC8009679; doi:10.7554/eLife.66488)
Supplement: Figure 1—source data 1. [file elife-66488-fig1-data1.xlsx]

## Sheet: Figs 1E and suppl. 1
Kinetics of fluorescence and current signals at pH 6.5, 6.0 and 5.5
units are ms
RTI	rise time current activation
DTI	decay time current desensitization
RTF	rise time fluorescence onset
	pH6.5	RTI	522	518	421	438	520	986	820	107	187	346	266
		DTI	1201	1139	1104	1062	1421	964	1284	626	526	745	584
		RTF1	947	543	168	628	848	441	207	205	187	264	187
		RTF2
K105C	pH6.0	RTI	230	192	146	146	137	156	184	116	159	119	164
		DTI	1562	1521	1241	924	1944	661	1522	686	584	669	628
		RTF1	303	185	226	185	226	101	125	64	85	80	108
		RTF2
	pH5.5	RTI	162	120	98	105		101	109	78	139	87	146
		DTI	1902	1906	1768	1061		1203	1604	1289	686	1361	642
		RTF1	245	127	80	84		125	145	61	81	64	104
		RTF2
	pH6.5	RTI						444	624	408	702	402	92	506
		DTI						786	905	926	926	1084	908	807
		RTF1						743	782	507	806	745	89	627
		RTF2
K133C	pH6.0	RTI	500	260	223	153	308	137	91	103	84	128	62	140
		DTI	2011	1519	1264	1335	1261	1267	1505	1364	1545	1162	1167	1466
		RTF1	302	224	416	205	290	128	107	100	120	164	41	121
		RTF2
	pH5.5	RTI	240	232	209	83	215	99	63	64	47	82		106
		DTI	3838	2474	2338	1970	1723	1386	1628	1387	1568	1303		1564
		RTF1	260	123	243	84	203	101	79	62	77	121		63
		RTF2
	pH6.5	RTI	462	575	600	583	305	515	499	720	539	327	175	262	304
		DTI	1181	1522	1518	1321	1863	1080	1402	1482	1180	866	718	888	680
		RTF1	743	1227	577	1135	941	630	721	750	759	525	185		345
		RTF2
I137	pH6.0	RTI	145	137	198	360	90	384	140	181	121	197	139	185	176
		DTI	1660	2536	2120	1128	2303	981	1543	2000	1583	676	748	708	564
		RTF1	503	263	315	318	102	205	300	224	121	186	106	188	186
		RTF2
	pH5.5	RTI	114	62			69	161	165	118	121	170		166	147
		DTI	2120	2849			2750	1260	2425	2703	2085	1025		681	625
		RTF1	182	170			96	141	138	97	164	165		125	263
		RTF2
	pH6.5	RTI	1458	354	255	298	427	593
		DTI	2359	982	2136	1320	1060	1261
		RTF1	1558	942	887	1030	971	1207
		RTF2
E235	pH6.0	RTI	170	94	110	98	162	185
		DTI	1099	904	1001	not good	not good	1242
		RTF1	159	159	134	218	269	297
		RTF2
	pH5.5	RTI	106	60	50	144	77	108
		DTI	1340	1060	1602	not good	not good	1659
		RTF1	120	76	53	141	125	134
		RTF2
	pH6.5	RTI	276	282	379	210
		DTI	1241	1140	937	1104
		RTF1	105	305	265	263
		RTF2	1183	1364	2225	2045
E355	pH6.0	RTI	116	111	199	141
		DTI	1636	1924	1199	2045
		RTF1	122	122	185	104
		RTF2	626	685	724	825
	pH5.5	RTI	91	95	130
		DTI	1864	2080	1352
		RTF1	103	103	108
		RTF2	319	426	361
	pH6.5	RTI	477	321	514	482	460	383	758	279
		DTI	1692	1602	1800	1406	1767	1428	1516	1567
		RTF1	1561	1383	1162	1238	1159	840	1245	1036
		RTF2
K388	pH6.0	RTI	165	239	201	121	83	113	254	156
		DTI	2021	1818	2499	1738	1963	1506	1715	1865
		RTF1	285	268	185	196	200	236	400	322
		RTF2
	pH5.5	RTI	73	209	101	69	47	91	154	60
		DTI	2307	2169	2862	2139	2282	1723	2122	2585
		RTF1	135	198	196	98	98	133	201	83
		RTF2
	pH6.5	RTI	682	638	1047	457	479	657	460
		DTI	1884	2120		1454	1883	1598	1555
		RTF1	1384	1581	1391	1240	2322	1482	795
		RTF2
Y389	pH6.0	RTI	164	116	206	120	131	147	137
		DTI	1750	1536	1318	2583	1580	1623	1802
		RTF1	363	241	361	158	184	258	169
		RTF2
	pH5.5	RTI	125	70	96	85	72	98	159
		DTI	2167	1786	1684	2807	2206	2124	1762
		RTF1	121	107	180	103	103	101	79
		RTF2
	pH6.5	RTI	579	477	313	312	542	383	417	475
		DTI	1762	1241	2641	1682	1364	1981	1625	1276
		RTF1	2463	1222	1181	970	921	1088	1098	1770
		RTF2
K392	pH6.0	RTI	82	179	77	92	113	71	117	184
		DTI	2627		3142	2361	1683	2587		1777
		RTF1	260	440	223	240	319	220	262	479
		RTF2
	pH5.5	RTI	73	116	57	54	84	50	60	99
		DTI	2926		3624	2960	2061	2801		2421
		RTF1	198	143	138	104	241	120	155	240
		RTF2
