# Supplementary material for: Kinetic analysis of ASIC1a delineates conformational signaling from proton-sensing domains to the channel gate
Source: eLife. 2021 Mar 17;10:e66488. doi: 10.7554/eLife.66488 (PMC8009679; doi:10.7554/eLife.66488)
Supplement: Figure 2—source data 1. [file elife-66488-fig2-data1.xlsx]

## Sheet: Fig.2C-kinetics
Kinetics of wrist mutants at pH6
Rise time or decay time (ms)
			Rise Time I
		pH
	E63C
		6	282	261	226	158
	H70C
		6	246	241	213	318	110	145	112	188
	Y71C
		6	99	100	135	154	136	261		181	78	156	127
	H72C
		6	262	223	80	90	140	75	89	183	103	170
	T419C
		6	130	248	295
	K424C
		6	77	93	119	143	101	80	31	122	110	180	70	197	228
	A425C
		6	260	195	242	257	265	282	296	283	259	221
	I428C
		6	167	238	156	121	180	135	161	107	140	130
			Decay Time I
		pH
	E63C
		6	5717	4921	4896	3039
	H70C
		6	1787	2104	3460	2482	2267	2548	2146	1565
	Y71C
		6	1040	1262	1165	899	782	1020	1022	879	1260	1322	1481
	H72C
		6	1463	2743	2784	1582	2664	3226	2647	2564	2343	2525
	T419C
		6	4021	3163	2505
	K424C
		6	1461	1461	701	1648	1342	1442	1629	1343	1382	1020	1029	1022	1164
	A425C
		6	903	1320	840	862	1141	1419	1660	958	1060	983
	I428C
		6	2266	1885	1686	1520	1723	1780	1804	2278	2545	1224
			Rise Time F
		pH
	E63C "on"
		6	206	84	66	78
	E63C "off"
		6	805	664	187	525
	H70C "on"
		6	122	134	223	165		83	142	100	159
	H70C "off"
		6	683	764	882	585		224	1023	403	764
	Y71C "on"
		6	94	110	108	95	86	156		143	81	123	155
	Y71C "off"
		6	1423	1806	1807	1690	2249	1631	2852	2823	718	1979	2387
	H72C "on"
		6	187	197	84	91	160	67	116	141	104	103
	H72C "off"
		6	127	1423	461	761	572	768	1461	1284	1162	964
	T419C "on"
		6	285	243	323
	T419C "off"
		6	542	986	869
	K424C "on"
		6	82	47	85	81	93	55	138	99	95	170	53	140	151
	K424C "off"
		6	267	424	543	508	66	329	495	485	514	338	358	124	540
	A425C
		6	243	147	106	85	167	226	145	265	183	145
	I428C
		6	203	259	159	145	365	121	165	106	225	125

## Sheet: Fig.2D-RTF RTI
Ratio rise time DF / rise time current activation (RTDF/RTI) (columns R-AC)
Columns C-P, Rise time or decay time (ms),
		Rise Time Current
		Rise Time Fluorescence
																	Ratio RTF/RTI
Wrist Mutants
	pH
E63C	Current
	6.5	681	483	346	424												0.240822	0.250518	0.401734	0.386792
	6	282	261	226	158												0.730496	0.321839	0.292035	0.493671
	5.5	260	212	221	131												0.396154	0.457547	0.21267	0.763359
E63C	Fluorescence
	6.5	164	121	139	164
	6	206	84	66	78
	5.5	103	97	47	100
H70C	Current
	6.5	361	336	229	287	346	302	242	224								0.401662	0.854167	1.03493	1.18467	0.421965	0.675497	0.921488	0.995536
	6	246	241	213	318	110	145	112	188								0.495935	0.556017	1.04695	0.518868	0.754545	0.97931	0.892857	0.845745
	5.5	163	190	177	233	84	121	78	115								0.509202	0.615789	0.677966	0.600858	1.40476	0.719008	0.794872	0.878261
H70C	Fluorescence
	6.5	145	287	237	340	146	204	223	223
	6	122	134	223	165	83	142	100	159
	5.5	83	117	120	140	118	87	62	101
Y71C	Current
	6.5	121	197	161	218	222	359	282	279	179	279	221					1.35537	1.13706	1.28571	0.766055	0.918919	0.779944	1.09574	1.02867	1.07821	0.878136	1.00452
	6	99	100	135	154	136	261	98	181	78	156	127					0.949495	1.1	0.8	0.616883	0.632353	0.597701	3.62245	0.790055	1.03846	0.788462	1.22047
	5.5	67			160	133	223	84	124	55	120	119					0.895522			0.4375	0.548872	0.641256	1.17857	0.806452	1.27273	0.775	0.697479
Y71C	Fluorescence
	6.5	164	224	207	167	204	280	309	287	193	245	222
	6	94	110	108	95	86	156	355	143	81	123	155
	5.5	60			70	73	143	99	100	70	93	83
H72C	Current
	6.5	344	244	203	201	239	197	523	524	338	382						0.72093	1.11475	0.921182	1.01493	1.20502	1.33503	1.14723	1.2271	1.01183	1.0445
	6	262	223	80	90	140	75	100	154	89	183	103	170				0.71374	0.883408	1.05	1.01111	1.14286	0.893333	1.25	1.03896	1.30337	0.770492	1.00971	0.605882
	5.5	165	134	74	64	164	63	83	143	103	149						1.24848	1.19403	0.824324	1	0.634146	0.968254	1.03614	0.692308	0.776699	0.644295
H72C	Fluorescence
	6.5	248	272	187	204	288	263	600	643	342	399
	6	187	197	84	91	160	67	125	160	116	141	104	103
	5.5	206	160	61	64	104	61	86	99	80	96
T419C	Current
	6.5	501	537	419													0.530938	0.90689	0.966587
	6	130	248	295													2.19231	0.979839	1.09492
	5.5	248	219	323													0.818548	0.926941	0.941176
T419C	Fluorescence
	6.5	266	487	405
	6	285	243	323
	5.5	203	203	304
K424C	Current
	6.5	202	321	294	260	240	215	315	277	227	398	199	322	383	256		0.89604	0.890966	0.982993	0.857692	1.125	1.03256	0.72381	0.823105	0.894273	0.816583	0.708543	0.940994	0.827676	1.41016
	6	77	93	119	143	101	80	31	122	110	180	70	197	228	98		1.06494	0.505376	0.714286	0.566434	0.920792	0.6875	4.45161	0.811475	0.863636	0.944444	0.757143	0.71066	0.662281	1.30612
	5.5	82	74	113	85	72	63	78	107	105	159	69	153	159	88		0.768293	0.878378	0.584071	0.670588	0.708333	0.984127	1.16667	0.738318	0.742857	0.81761	0.608696	0.673203	0.628931	1.125
K424C	Fluorescence
	6.5	181	286	289	223	270	222	228	228	203	325	141	303	317	361
	6	82	47	85	81	93	55	138	99	95	170	53	140	151	128
	5.5	63	65	66	57	51	62	91	79	78	130	42	103	100	99
A425C	Current
	6.5	499	462	593	756	461	600	561	699	701							0.96994	0.437229	0.074199	0.141534	0.140998	0.97	0.0534759	0.58083	0.0898716
	6	260	195	242	257	265	282	296	283	259	221						0.934615	0.753846	0.438017	0.330739	0.630189	0.801418	0.489865	0.936396	0.706564	0.656109
	5.5	178	153	177	139	184	225	203	198	158	160						0.921348	0.921569	0.683616	0.741007	0.690217	0.888889	0.605911	0.909091	0.917722	0.79375
A425C	Fluorescence
	6.5	484	202	44	107	65	582	30	406	63
	6	243	147	106	85	167	226	145	265	183	145
	5.5	164	141	121	103	127	200	123	180	145	127
I428C	Current
	6.5	383	462	404	380	400	435	339	481	415	402						0.955614	1.09307	0.987624	1.27368	1.505	1.2069	0.846608	0.885655	1.06988	1.00995
	6	167	238	156	121	180	135	161	107	140	130						1.21557	1.08824	1.01923	1.19835	2.02778	0.896296	1.02484	0.990654	1.60714	0.961538
	5.5	72	196	89	79	136	105	122	78	123	122						0.902778	0.729592	0.910112	1.53165	1.80882	0.761905	0.852459	0.833333	0.715447	0.696721
I428C	Fluorescence
	6.5	366	505	399	484	602	525	287	426	444	406
	6	203	259	159	145	365	121	165	106	225	125
	5.5	65	143	81	121	246	80	104	65	88	85
Outside Mutants
	pH
K105C	Current
	6.5	522	518	421	438	520	986	820	107	187	346	266					1.81418	1.04826	0.39905	1.43379	1.63077	0.447262	0.252439	1.91589	1	0.763006	0.703008
	6	230	192	146	146	137	156	184	116	159	119	164					1.31739	0.963542	1.54795	1.26712	1.64964	0.647436	0.679348	0.551724	0.534591	0.672269	0.658537
	5.5	162	120	98	105		101	109	78	139	87	146					1.51235	1.05833	0.816327	0.8		1.23762	1.33028	0.782051	0.582734	0.735632	0.712329
K105C	Fluorescence
	6.5	947	543	168	628	848	441	207	205	187	264	187
	6	303	185	226	185	226	101	125	64	85	80	108
	5.5	245	127	80	84		125	145	61	81	64	104
K133C	Current
	6.5	444	624	408	702	402	982	506									1.67342	1.25321	1.24265	1.14815	1.85323	0.677189	1.23913
	6	500	260	223	153	308	137	91	103	84	128	92	140				0.604	0.861538	1.86547	1.33987	0.941558	0.934307	1.17582	0.970874	1.42857	1.28125	0.967391	0.864286
	5.5	240	232	209	83	215	99	63	64	47	82	62	106				1.08333	0.530172	1.16268	1.01205	0.944186	1.0202	1.25397	0.96875	1.6383	1.47561	0.66129	0.59434
K133C	Fluorescence
	6.5	743	782	507	806	745	665	627
	6	302	224	416	205	290	128	107	100	120	164	89	121
	5.5	260	123	243	84	203	101	79	62	77	121	41	63
I137C	Current
	6.5	462	575	600	583	305	515	499	720	539	327	264		304			1.60823	2.13391	0.961667	1.94683	3.08525	1.2233	1.44489	1.04167	1.40816	1.6055	0.912879		1.13487
	6	145	137	198	360	90	384	140	181	121	197	175	185	176	178		3.46897	1.91971	1.59091	0.883333	1.13333	0.533854	2.14286	1.23757	1	0.944162	1.05714	1.01622	1.05682	3.48876
	5.5	114	62			69	161	165	118	121	170	139	166	147	153		1.59649	2.74194			1.3913	0.875776	0.836364	0.822034	1.35537	0.970588	0.76259	0.753012	1.78912	3.17647
I137C	Fluorescence
	6.5	743	1227	577	1135	941	630	721	750	759	525	241		345
	6	503	263	315	318	102	205	300	224	121	186	185	188	186	621
	5.5	182	170			96	141	138	97	164	165	106	125	263	486
E235C	Current
	6.5	1458	354	255	298	427	593										1.06859	2.66102	3.47843	3.45638	2.274	2.03541
	6	170	94		98	162	185										0.935294	1.69149		2.22449	1.66049	1.60541
	5.5	106	60	50	144	77	108										1.13208	1.26667	1.06	0.979167	1.62338	1.24074
E235C	Fluorescence
	6.5	1558	942	887	1030	971	1207
	6	159	159		218	269	297
	5.5	120	76	53	141	125	134
E355C	Current
	6.5	276	282	379	210												0.380435	1.08156	0.699208	1.25238
	6	116	111	199	141												1.05172	1.0991	0.929648	0.737589
	5.5	91	95	130													1.13187	1.08421	0.830769
E355C	Fluorescence
	6.5	105	305	265	263
	6	122	122	185	104
	5.5	103	103	108
K388C	Current
	6.5	477	321	514	482	460	383	758	279								3.27254	4.30841	2.2607	2.56846	2.51957	2.19321	1.64248	3.71326
	6	165	239	201	121	83	254	156									1.72727	1.12134	0.920398	1.61983	2.40964	1.5748	2.0641
	5.5	73	209	101	69	47	91	154	60								1.84932	0.947368	1.94059	1.42029	2.08511	1.46154	1.30519	1.38333
K388C	Fluorescence
	6.5	1561	1383	1162	1238	1159	840	1245	1036
	6	285	268	185	196	200	400	322
	5.5	135	198	196	98	98	133	201	83
Y389C	Current
	6.5	682	638	1047	457	479	657	460									2.02933	2.47806	1.32856	2.71335	4.8476	2.25571	1.72826
	6	116	120	131	147	137											2.07759	1.31667	1.40458	1.7551	1.23358
	5.5	70	96	85	72	98	159										1.72857	1.11458	2.11765	1.43056	1.05102	0.63522
Y389C	Fluorescence
	6.5	1384	1581	1391	1240	2322	1482	795
	6	241	158	184	258	169
	5.5	121	107	180	103	103	101	79
K392C	Current
	6.5	579	477	313	312	542	383	417	475								4.25389	2.56184	3.77316	3.10897	1.69926	2.84073	2.63309	3.72632
	6	82	77	71	117												3.17073	2.8961	3.09859	2.23932
	5.5	73	116	57	54	84	50	60	99								2.71233	1.23276	2.42105	1.92593	2.86905	2.4	2.58333	2.42424
K392C	Fluorescence
	6.5	2463	1222	1181	970	921	1088	1098	1770
	6	260	223	220	262
	5.5	198	143	138	104	241	120	155	240

## Sheet: Fig.2F-act
Activation curves of fluorescence signals
Normalized values
E63C
	7.8	-0.0275377		0.0929492		0.145872		0.164613		0.0846137
	7.4	0.558804		0.235423		0.226708		0.348782		0.353547
	7.2	0.874805		0.660677		0.594207		0.678833		0.721633
	7	1.0056		0.896068		0.916793		0.969635		0.937686
	6.5	1		1		1		1		1
	6	1.22391		0.93266		0.992784		0.859211		0.942212
	5.5	0.922566		0.938886		0.903017		0.919146		0.877945
H72C
	7.2	0.095628		0.0788563		-0.0104748		0.0943681
	7	0.297989		0.332193		0.267307		0.227794
	6.8	0.478777		0.56099		0.422841		0.392416
	6.5	0.836429		0.964872		0.752069		0.748381
	6	0.942118		1.10435		0.96044		0.957684
	5.5	1		1		1		1
	5	0.892591		1.08544		0.826864		0.959653
T419C
	7.8	-0.0250435		-0.069564		0.00307766				-0.00561734
	7	0.283119		0.137733		0.22239				0.0916289
	6.8	0.191541		0.239196		0.343074				0.177742
	6	0.42904		0.482648		0.624926				0.476688
	5.5	0.682434		0.81625		0.825222				0.859287
	4.5	1		1		1				1
	4	0.886849		0.988469		0.860354				1.01624

## Sheet: Fig.2G-pH50
pH dependence of wrist mutants and mutants in other regions
pH50 values from fits
		pH50 activation I
																					2017-10-31		2017-11-17			2018-01-18			2018-09-04
G212D		6.176	6.283	6.194	6.286	6.13	6.178	6.255	6.103	6.152	6.204	6.178	6.125	6.255	6.319	6.318	6.463	6.141	6.331	6.112	6.131	6.266	6.084	6.091	6.135	6.261	6.204	6.423	6.184	6.482	6.24
E63C		6.552	6.665	6.702	6.632	6.562
H70C		6.464	6.436	6.448	6.49	6.558
Y71C		6.006	6.15	6.155	6.212
H72C		6.551	6.562	6.642	6.671	6.76	6.748	6.759	6.694
T419C		6.413	6.528	6.578	6.517	6.497
K424C		6.522	6.489	6.448	6.341
A425C		6.178	6.042	6.091	6.195
I428C		6.46	6.48	6.533	6.475	6.457
K105C		6.4656	6.307	6.265	6.345
K133C		6.56	6.42	6.55	6.445	6.448	6.439
I137C		6.5035	6.491	6.445	6.533
E235C		6.578	6.37	6.16	6.59
E355C		6.59	6.56	6.56	6.37
K388C		6.5401	6.573	6.526	6.52
Y389C		5.962	6.11	6.064	6.008	6.104	6.044	6.153
K392C		6.5571	6.561	6.511	6.487	6.532
		pH50 SSD (desensitization)
G212D		7.188	7.216	7.192	7.101	7.148	7.054	7.005	7.135	7.161	7.182	7.172	7.18	7.205	7.204	7.138	7.177	7.2
E63C		7.199	7.173	7.154	7.177	7.174
H70C		7.137	7.179	7.128	7.172	7.202	7.171
Y71C		7.268	7.291	7.262	7.281
H72C		7.225	7.196	7.238	7.206	7.23	7.159
T419C		7.163	7.144	7.141	7.175	7.149	7.125
K424C		7.259	7.271	7.248	7.248	7.268
A425C		7.102	7.054	7.108	7.014	7.091
I428C		7.213	7.214	7.222	7.217	7.171	7.184
K105C		7.12	7.1	7.18	7.2	7.22	7.26	7.22	7.24
K133C		7.17	7.17	7.22	7.13
I137C		6.9471	7.0393	6.9877	7.0083
E235C		7.08	7.08	7.07	7.07	7.07
E355C		7.12	7.16	7.15	7.16
K388C		7.1452	7.05	6.9482	7.1429	7.0469	7.0111	6.9979	7.0586
Y389C		6.95	6.96	6.96	7	6.99	6.97	6.97	6.96
K392C		7.0317	7.1426	7.1013	6.9735	7.0993
		pH50 activation F
E63C		7.408	7.284	7.262	7.342	7.342
H70C		6.909	6.904	6.963	6.907	6.867	6.796	6.786	6.626
Y71C		6.86	6.945	6.898	7.033
H72C		6.827	6.837	6.777	6.731
T419C		5.963	6.054	6.434	6.023
K424C		6.585	6.66	6.762	6.764	6.634	6.576	6.773
A425C		6.332	6.33	6.427	6.532
I428C		6.775	6.757	6.958	6.923	6.861
K105C		7.1082	7.0549	7.053	7.0474
K133C		7.23	7.1	7.18	7.184	7.21
I137C		7.1647	7.0606	7.1034	7.0398
E235C		7	7.05	7.058	7.02	7.18
E355C-first		6.537		7.28		6.5		6.896				6.84		5.833
E355C-2nd		7.16		6.99		7.02		7.02		7.07		7.18		6.984		7.13
K388C		7.0699	7.0117	6.9908	7.0026	7.0124	7.107	7.1048
Y389C		6.988	6.992	7.024	7	7.004	7.038
K392C		7.1201	7.1338	7.1155	7.116	7.0923	7.0669	7.1557	7.1114

## Sheet: Fig2-supp1-kinetics
Kinetics of wrist mutants at pH6.5 and 5.5
Rise time or decay time (ms)
				Rise Time I
			pH
		E63C
			6.5	681	483	346	424
			5.5	260	212	221	131
		H70C
			6.5	361	336	229	287	346	302	242	224
			5.5	163	190	177	233	84	121	78	115
		Y71C
			6.5	121	197	161	218	222	359	282	279	179	279	221
			5.5	67			160	133	223	84	124	55	120	119
		H72C
			6.5	344	244	203	201	239	197	523	524	338	382
			5.5	165	134	74	64	164	63	83	143	103	149
		T419C
			6.5	501	537	419
			5.5	248	219	323
		K424C
			6.5	202	321	294	260	240	215	315	277	227	398	199	322	383	256
			5.5	82	74	113	85	72	63	78	107	105	159	69	153	159	88
		A425C
			6.5	499	462	593	756	461	600	561	699	701
			5.5	178	153	177	139	184	225	203	198	158	160
		I428C
			6.5	383	462	404	380	400	435	339	481	415	402
			5.5	72	196	89	79	136	105	122	78	123	122
				Decay Time I
		E63C
			6.5	4800	3836	4262	3022
			5.5	6163	5146	5259	3123
		H70C
			6.5	1597	2220	2680	2041	1664	1726	1826	1709
			5.5	1917	2104	3138	2730	2027	2143	2387	1724
		Y71C
			6.5	1124	1363	1284	960	880	1201	922	920	1021	1185	1701
			5.5	981			863	781	362	901	854	1141	1394	1520
		H72C
			6.5	1744	2457	2381	1849	2124	2644	2385	2525	2363	2647
			5.5	1398	2841	2360	1306	2522	3001	2285	2745	2744	2507
		T419C
			6.5	3262	4025	2640
			5.5	4457	2979	2785
		K424C
			6.5	1360	1403	864	1581	1259	1480	1442	1401	1402	879	762	823	922	985
			5.5	998	1462	1301	1629	1243	1301	1688	1404	1282	843	1046	1219	1049	1200
		A425C
			6.5	1339	1421	865	861	1640	2000	1523	1483	1444
			5.5	842	2145	660	684	983	1460	1501	865	1142	920
		I428C
			6.5	1280	1218	1001	1341	1681	1205	1040	1384	1282	919
			5.5	2243	1803	2084	1702	1703	1900	1901	2117	2700	1707
				Rise Time F
			pH
		E63C "on"
			6.5	164	121	139	164
			5.5	103	97	47	100
		E63C "off"
			6.5
			5.5
		H70C "on"
			6.5	145	287	237	340		146	204	223	223
			5.5	83	117	120	140		118	87	62	101
		H70C "off"
			6.5	567	733	883	464			819	502	742
			5.5	541	549	744	621		327	841	699	685
		Y71C "on"
			6.5	164	224	207	167	204	280	309	287	193	245	222
			5.5	60			70	73	143	99	100	70	93	83
		Y71C "off"
			6.5	1256	1504	1868	1470	1902	2514	2150	3147		3482	2185
			5.5				1726	2439	1925	2282	2746		2114	2106
		H72C "on"
			6.5	248	272	187	204	288	263	600	643	342	399
			5.5	206	160	61	64	104	61	86	99	80	96
		H72C "off"
			6.5	805	475	419	603	540	601	1244	1302	1181	982
			5.5	486	1408	363	583	558	660	1340	1064	1043	1044
		T419C "on"
			6.5	266	487	405
			5.5	203	203	304
		T419C "off"
			6.5	266	487	405
			5.5
		K424C "on"
			6.5	181	286	289	223	270	222	228	228	203	325	141	303	317	361
			5.5	63	65	66	57	51	62	91	79	78	130	42	103	100	99
		K424C "off"
			6.5	104	27	524	404	584	623	363	463	569	305		742	586	444
			5.5	67	242	503	501	52	423	705	445	566	415	184	677	396	319
		A425C
			6.5	484	202	44	107	65	582	30	406	63
			5.5	164	141	121	103	127	200	123	180	145	127
		I428C
			6.5	366	505	399	484	602	525	287	426	444	406
			5.5	65	143	81	121	246	80	104	65	88	85

## Sheet: Fig2-supp2-pHdep
pH dependence curves of current activation and desensitization (SSD)
Normalized current amplitudes
		Activation curve I
	pH
E63C
	7	0.00764341		0.0207669		0.0285292		0.0174238		0.00897833
	6.8	0.0598763		0.228178		0.300222		0.183081		0.0978429
	6.7	0.131192		0.375946		0.454081		0.308428		0.160532
	6.6	0.361319		0.664665		0.725278		0.60619		0.420254
	6.5	0.644368		0.81801		0.855293		0.730927		0.631654
	6	1		1		1		1		1
	5.5	0.97994		0.962955		0.937428		0.964271		0.962955
H72C
	7	0.0224763		0.0232142		0.0502685		0.0703479		0.0799682		0.0853747		0.0795188		0.0661961
	6.8	0.0409298		0.0466003		0.100148		0.155375		0.406141		0.425624		0.391716		0.308054
	6.7	0.258013		0.305261		0.526763		0.54403		0.648945		0.630753		0.651721		0.519711
	6.6	0.350341		0.425345		0.556507		0.600876		0.794166		0.715274		0.75657		0.602632
	6.5	0.635921		0.599565		0.706776		0.822794		0.827259		0.761763		0.79799		0.662409
	6	1.01119		0.978454		0.997266		1.00454		1.00085		0.997011		0.962066		0.85381
	5.5	1		1		1		1		1		1		1		1
T419C
	6.8	0.0126501		0.0167478		0.0499457		0.0586216		0.0170001
	6.6	0.305124		0.396039		0.50633		0.436796		0.384987
	6.3	0.648186		0.803489		0.785144		0.745239		0.740277
	6	0.81123		0.912966		0.898277		0.872877		0.847642
	5	0.937869		0.986994		0.973646		0.975639		0.953302
	4.5	1		1		1		1		1
	4	0.997239		0.968676		0.969298		0.987542		0.979603
		SSD curve I
E63C
	7.8	0.997328		0.995843		0.974106		0.961342		1.01429
	7.5	1		1		1		1		1
	7.25	0.83605		0.904131		0.969317		0.896179		0.925996
	7.2	0.47024		0.647818		0.773288		0.614634		0.657347
	7.15	0.235962		0.365121		0.474971		0.328367		0.359619
	7.1	0.0746838		0.126929		0.151512		0.109198		0.121954
	7	0.0291346		0.0200935		0.0193127		0.020839		0.0427045
H72C
	7.8	1		1		1		1		1		1
	7.5	0.964855		0.991408		1.02283		0.975317		0.988242		1.00883
	7.4	0.933388		0.977323		0.991293		0.952239		0.975858		0.980273
	7.3	0.776823		0.853787		0.789234		0.807752		0.783374		0.885153
	7.2	0.390889		0.532997		0.328405		0.490265		0.371945		0.676387
	7.1	0.0608492		0.108973		0.0315698		0.108666		0.040733		0.271636
	7	0.00685013		0.0127487		0.00316015		0.00897349		0.0055871		0.0297341
T419C
	7.8	1		1		1		1		1		1
	7.5			0.985352		1.00008		0.999595		0.975118		0.968707
	7.3	0.939619		0.950169		0.96858		0.962798		0.940307		0.964068
	7.2	0.674265		0.744669		0.755575		0.584198		0.70704		0.84363
	7.15	0.466739		0.56407		0.602688		0.415367		0.553652		0.664205
	7.1	0.132803		0.233252		0.245736		0.183241		0.197625		0.326327
	7	0.00887111		0.0146772		0.0132237		0.0237799		0.014479		0.0230419
