# Supplementary material for: Kinetic analysis of ASIC1a delineates conformational signaling from proton-sensing domains to the channel gate
Source: eLife. 2021 Mar 17;10:e66488. doi: 10.7554/eLife.66488 (PMC8009679; doi:10.7554/eLife.66488)
Supplement: Figure 3—source data 1. [file elife-66488-fig3-data1.xlsx]

## Sheet: Fig.3D
Rise time fluorescence at 3 pH values
(ms)
	pH6.5																pH6.0																pH5.5
E63C	681	483	346	424													282	261	226	158													260	212	221	131
H70C	361	336	229	287	346	302	242	224									246	241	213	318	110	145	112	188									163	190	177	233	84	121	78	115
Y71C	121	197	161	218	222	359	282	279	179	279	221						99	100	135	154	136	261		181	78	156	127						67			160	133	223	84	124	55	120	119
H72C	344	244	203	201	239	197	523	524	338	382							262	223	80	90	140	75	89	183	103	170							165	134	74	64	164	63	83	143	103	149
T419C	501	537	419														130	248	295														248	219	323
K424C	202	321	294	260	240	215	315	277	227	398	199	322	383	256			77	93	119	143	101	80	31	122	110	180	70	197	228	98			82	74	113	85	72	63	78	107	105	159	69	153	159	88
A425C	499	462	593	756	461	600	561	699	701								260	195	242	257	265	282	296	283	259	221							178	153	177	139	184	225	203	198	158	160
I428C	383	462	404	380	400	435	339	481	415	402							167	238	156	121	180	135	161	107	140	130							72	196	89	79	136	105	122	78	123	122
