# Supplementary material for: Kinetic analysis of ASIC1a delineates conformational signaling from proton-sensing domains to the channel gate
Source: eLife. 2021 Mar 17;10:e66488. doi: 10.7554/eLife.66488 (PMC8009679; doi:10.7554/eLife.66488)
Supplement: Figure 4—source data 1. [file elife-66488-fig4-data1.xlsx]

## Sheet: Fig4C
DF/F/I for the single and double mutants in the palm
the relative fluorescence, DF/F, was normalized to the current measured at pH6
		A81C	F (mV)	DF (A)	DF/F	%DF/F	Imax						A81C Y417V	F (mV)	DF (A)	DF/F	%DF/F	Imax
						pH 6	pH 6		DF/F / I ampl.	Normalization to the mean of each day							pH 6	pH 6		DF/F / I ampl.	Normalization to the mean of each day
							A	micro A										A	micro A
		2017-10-04	-3.9711e-10	-7.2601e-11	0.182823	18.2823	-4.2423e-05	-42.423	0.430953	0.872612			2017-10-25	-5.1333e-10	-6.3531e-12	0.0123762	1.23762	-6.5545e-05	-65.545	0.0188821	0.0382332
			-4.6406e-10	-9.1506e-11	0.197186	19.7186	-4.8732e-05	-48.732	0.404633	0.819317				-5.0395e-10	-8.5104e-12	0.0168874	1.68874	-3.1208e-05	-31.208	0.0541124	0.109569
			-3.8537e-10	-1.0716e-10	0.27807	27.807	-7.6932e-05	-76.932	0.36145	0.731878				-5.09e-10	-1.0454e-11	0.0205383	2.05383	-5.4431e-05	-54.431	0.0377327	0.0764028
			-5.0791e-10	-1.5396e-10	0.303125	30.3125	-4.4024e-05	-44.024	0.688544	1.39419				-5.1232e-10	-3.2468e-12	0.00633745	0.633745	-2.6749e-05	-26.749	0.0236923	0.0479731
			-1.8325e-10	-1.8565e-11	0.10131	10.131	-1.7355e-05	-17.355	0.583749	1.182	0.493866			-5.1212e-10	-5.0444e-13	0.000985004	0.0985004	-3.1095e-05	-31.095	0.00316772	0.00641414
		2020-01-30	-1.9673e-10	-3.8806e-11	0.197255	19.7255	-5.5894e-05	-55.894	0.352909	1.33951			2020-01-30	-1.9385e-10	-9.446e-12	0.0487284	4.87284	-0.00010185	-101.85	0.0478433	0.181595
			-6.3915e-11	-3.5814e-12	0.0560338	5.60338	-4.566e-05	-45.66	0.12272	0.465798				-1.8495e-10	-5.4843e-12	0.0296529	2.96529	-0.00010128	-101.28	0.0292781	0.111129
			-1.2702e-10	-1.9715e-11	0.155212	15.5212	-4.1387e-05	-41.387	0.375025	1.42346				-1.5651e-10	-8.2354e-12	0.052619	5.2619	-6.3479e-05	-63.479	0.082892	0.314627
			-1.4896e-10	-2.8203e-11	0.189333	18.9333	-6.9739e-05	-69.739	0.271488	1.03046				-1.5286e-10	-7.7729e-12	0.0508498	5.08498	-2.254e-05	-22.54	0.225598	0.856285
			-1.4501e-10	-2.5359e-11	0.174878	17.4878	-8.9605e-05	-89.605	0.195165	0.740773	0.263461			-9.88e-11	-5.2011e-12	0.0526427	5.26427	-1.3233e-05	-13.233	0.397814	1.50995
		2020-02-06	-1.525e-10	-2.29216e-11	0.150306	15.0306	-3.6501e-05	-36.501	0.411785	0.985687			2020-02-06	-4.3225e-11	-8.29368e-13	0.0191872	1.91872	-1.4549e-05	-14.549	0.13188	0.315681
			-2.162e-10	-4.3874e-11	0.202932	20.2932	-6.6206e-05	-66.206	0.306517	0.733707				-3.7559e-10	-2.43407e-11	0.0648066	6.48066	-3.8836e-05	-38.836	0.166872	0.399442
			-1.3083e-10	-2.48901e-11	0.190248	19.0248	-2.021e-05	-20.21	0.941354	2.25331				-1.0468e-10	-7.45909e-12	0.0712561	7.12561	-3.9177e-05	-39.177	0.181883	0.435371
			-1.4848e-10	-1.75923e-11	0.118483	11.8483	-4.9511e-05	-49.511	0.239306	0.572825				-1.0563e-10	-5.44707e-12	0.0515675	5.15675	-1.8743e-05	-18.743	0.275129	0.658575
			-2.5856e-10	-2.91807e-11	0.112859	11.2859	-5.9443e-05	-59.443	0.18986	0.454467	0.417764			-2.6628e-10	-1.06445e-11	0.0399748	3.99748	-2.3253e-05	-23.253	0.171913	0.411506
		2020-02-20	-3.0916e-10	-1.06947e-11	0.0345928	3.45928	-1.75e-05	-17.5	0.197673	0.437023			2020-02-20	-7.4644e-11	-3.53345e-12	0.0473374	4.73374	-8e-05	-80	0.0591717	0.130819
			-1.6886e-10	-2.83428e-11	0.167848	16.7848	-2.54e-05	-25.4	0.660819	1.46096				-1.2113e-10	-3.79352e-12	0.0313178	3.13178	-2.75e-05	-27.5	0.113883	0.251776
			-1.6365e-10	-2.00952e-11	0.122794	12.2794	-2.42e-05	-24.2	0.507412	1.12181				-9.9008e-11	-1.96462e-12	0.019843	1.9843	-2.71e-05	-27.1	0.0732216	0.161881
			-1.3231e-10	-1.83142e-11	0.138419	13.8419	-3.11e-05	-31.1	0.445077	0.983992				-8.898e-11	-2.94104e-12	0.0330528	3.30528	-4.33e-05	-43.3	0.0763345	0.168763
			-1.9256e-10	-1.66596e-11	0.0865164	8.65164	-1.92e-05	-19.2	0.450606	0.996217	0.452317
									mean	st. dev	SEM	n								mean	st. dev	SEM	n
									0.406852	0.199178	0.0445375	20								0.114279	0.102074	0.0234173	19
		S83C	F (mV)	DF (A)	DF/F	%DF/F	Imax						S83C Y417V	F (mV)	DF (A)	DF/F	%DF/F	Imax
						pH 6	pH 6		DF/F / I ampl.	Normalization to the mean of each day							pH 6	pH 6		DF/F / I ampl.	Normalization to the mean of each day
							A	micro A										A	micro A
		2017-10-04	-5.3766e-10	-2.7016e-10	0.502474	50.2474	-2.9101e-05	-29.101	1.72665	0.926399			2017-11-23	-5.171e-10	-1.9372e-11	0.0374628	3.74628	-4.8613e-05	-48.613	0.0770633	0.0413467
			-5.0729e-10	-9.8199e-11	0.193576	19.3576	-8.2789e-05	-82.789	0.233818	0.12545				-5.1438e-10	-4.66531e-11	0.0906977	9.06977	-5.7565e-05	-57.565	0.157557	0.0845339
			-5.045e-10	-4.0218e-10	0.797185	79.7185	-2.6351e-05	-26.351	3.02526	1.62314				-5.1155e-10	1.5347e-11	-0.030001	-3.0001	-1.7494e-05	-17.494	-0.171493	-0.0920109
			-5.0302e-10	-3.0941e-10	0.615105	61.5105	-2.4907e-05	-24.907	2.46961	1.32501	1.86383			-5.1098e-10	-1.812e-11	0.0354613	3.54613	-2.0257e-05	-20.257	0.175057	0.093923
		2020-01-30	-1.2461e-10	-2.93215e-12	0.0235306	2.35306	-3.9582e-05	-39.582	0.0594478	0.194259				-5.0495e-10	-1.9962e-11	0.0395326	3.95326	-5.7871e-05	-57.871	0.0683116	0.0366511
			-1.4281e-10	-3.2012e-12	0.0224158	2.24158	-3.8934e-05	-38.934	0.0575738	0.188136			2020-01-30	-2.8996e-10	-6.74968e-12	0.023278	2.3278	-2.5204e-05	-25.204	0.0923582	0.301801
			-1.1364e-10	-3.80986e-12	0.0335257	3.35257	-5.5042e-05	-55.042	0.0609093	0.199035				-1.8375e-10	-4.16432e-12	0.022663	2.2663	-2.5192e-05	-25.192	0.089961	0.293968
			-1.7279e-10	-3.3647e-11	0.194728	19.4728	-6.8284e-05	-68.284	0.285173	0.931868				-2.0332e-10	-3.29768e-12	0.0162192	1.62192	-2.7526e-05	-27.526	0.0589231	0.192544
			-1.1015e-10	-1.8132e-11	0.164612	16.4612	-5.7316e-05	-57.316	0.287201	0.938493				-3.5002e-10	-5.57664e-12	0.0159323	1.59323	-1.9869e-05	-19.869	0.080187	0.262029
			-6.7284e-11	-1.1791e-11	0.175242	17.5242	-2.8624e-05	-28.624	0.612221	2.00057				-4.0794e-10	-8.30328e-12	0.0203542	2.03542	-3.8051e-05	-38.051	0.0534918	0.174797
			-1.547e-10	-2.1591e-11	0.139567	13.9567	-1.4015e-05	-14.015	0.995839	3.25413				-1.3096e-10	-2.35054e-12	0.0179485	1.79485	-1.4799e-05	-14.799	0.121282	0.396317
			-2.8002e-10	-2.9807e-11	0.106446	10.6446	-3.4307e-05	-34.307	0.310275	1.01389				-1.3613e-10	-2.33717e-12	0.0171687	1.71687	-8.9541e-05	-89.541	0.0191741	0.0626556
			-4.9176e-10	-2.06246e-11	0.0419404	4.19404	-4.8709e-05	-48.709	0.086104	0.281364			2020-02-06	-1.2333e-10	-2.35037e-12	0.0190576	1.90576	-2.6191e-05	-26.191	0.0727638	0.206836
			-1.9689e-10	-3.0034e-11	0.152542	15.2542	-4.9934e-05	-49.934	0.305487	0.998249	0.306023			-9.1484e-11	-2.69135e-12	0.0294188	2.94188	-4.145e-06	-4.145	0.709742	2.01749
		2020-02-06	-7.598e-11	-3.1058e-12	0.0408765	4.08765	-8.3329e-06	-8.3329	0.490544	1.39441				-6.029e-11	-1.8767e-12	0.0311279	3.11279	-7.4477e-06	-7.4477	0.417953	1.18806
			-2.5445e-10	-6.72562e-12	0.026432	2.6432	-2.5109e-05	-25.109	0.105269	0.299234				-1.3895e-10	-4.23598e-12	0.0304856	3.04856	-1.5767e-05	-15.767	0.193351	0.549613
			-8.8419e-11	-3.11896e-12	0.0352748	3.52748	-7.7357e-06	-7.7357	0.456	1.29621				-2.1774e-10	-6.3836e-12	0.0293175	2.93175	-1.2238e-05	-12.238	0.239561	0.68097
			-1.0912e-10	-2.79474e-12	0.0256116	2.56116	-1.2688e-05	-12.688	0.201857	0.573792			2020-02-20	-7.1159e-11	-3.02162e-12	0.0424629	4.24629	-2.4047e-05	-24.047	0.176583	0.504168
			-2.444e-10	-2.99342e-11	0.12248	12.248	-4.2587e-05	-42.587	0.2876	0.817524				-9.7004e-11	-2.36403e-12	0.0243704	2.43704	-6.1455e-05	-61.455	0.0396557	0.113222
			-9.5742e-11	-1.95848e-12	0.0204558	2.04558	-1.3207e-05	-13.207	0.154886	0.440274				-2.8754e-10	-6.4884e-12	0.0225652	2.25652	-4.575e-05	-45.75	0.0493229	0.140823
			-9.1079e-11	-2.47517e-12	0.0271761	2.71761	-1.257e-05	-12.57	0.216198	0.614557				-1.3104e-10	-5.41512e-12	0.0413242	4.13242	-5.2189e-05	-52.189	0.0791818	0.226074
			-4.7748e-11	-4.388e-13	0.00918991	0.918991	-2.9872e-05	-29.872	0.0307643	0.0874496				-8.8954e-11	-3.32912e-12	0.0374252	3.74252	-3.1225e-05	-31.225	0.119856	0.342206
			-1.0922e-10	-1.32786e-11	0.121577	12.1577	-1.4725e-05	-14.725	0.825648	2.34696				-2.3284e-10	-8.78334e-12	0.0377226	3.77226	-1.3821e-05	-13.821	0.272937	0.779271
			-3.0497e-10	-5.91397e-12	0.019392	1.9392	-2.9439e-05	-29.439	0.0658717	0.187245				-6.6171e-11	-1.50141e-12	0.0226898	2.26898	-2.3933e-05	-23.933	0.0948057	0.270683
			-7.505e-11	-3.53966e-12	0.047164	4.7164	-3.6281e-05	-36.281	0.129996	0.369524				-1.7309e-10	-8.73272e-12	0.0504519	5.04519	-2.6566e-05	-26.566	0.189912	0.542223
			-4.756e-11	-2.14901e-12	0.0451852	4.51852	-1.6424e-05	-16.424	0.275117	0.782039			2020-03-11	-1.1393e-10	-2.02267e-12	0.0177536	1.77536	-2.1126e-05	-21.126	0.0840368	0.176282
			-1.1101e-10	-2.21511e-11	0.199541	19.9541	-1.4169e-05	-14.169	1.4083	4.00318				-4.9478e-11	-7.43673e-13	0.0150304	1.50304	-2.033e-05	-20.33	0.073932	0.155085
			-5.8382e-11	-1.98272e-12	0.0339612	3.39612	-1.2257e-05	-12.257	0.277076	0.787606	0.351795			-7.3066e-11	-1.26276e-12	0.0172825	1.72825	-1.8306e-05	-18.306	0.0944087	0.198039
		2020-02-20	-1.843e-10	-2.74355e-11	0.148863	14.8863	-6.3846e-05	-63.846	0.23316	0.665702				-1.2092e-10	-4.1134e-12	0.0340175	3.40175	-2.2941e-05	-22.941	0.148283	0.311049
			-5.1273e-10	-3.15778e-11	0.0615876	6.15876	-3.4521e-05	-34.521	0.178406	0.509373				-3.7109e-11	-1.0801e-12	0.0291061	2.91061	-3.5079e-05	-35.079	0.0829731	0.174051
			-1.0338e-10	-2.09624e-11	0.20277	20.277	-5.8054e-05	-58.054	0.349279	0.997237				-5.5927e-11	-8.78334e-12	0.15705	15.705	-3.8003e-05	-38.003	0.413257	0.866878
			-1.6019e-10	-2.32127e-11	0.144907	14.4907	-2.5964e-05	-25.964	0.558109	1.59347				-1.0413e-10	-3.2452e-12	0.0311649	3.11649	-2.9076e-05	-29.076	0.107184	0.224838
			-5.1273e-10	-2.20565e-11	0.0430178	4.30178	-2.0836e-05	-20.836	0.206459	0.589467				-1.4287e-10	-4.3908e-12	0.0307328	3.07328	-3.8816e-05	-38.816	0.0791757	0.166085
			-3.3189e-10	-1.6902e-11	0.0509265	5.09265	-3.0017e-05	-30.017	0.169659	0.484399
			-1.446e-10	-1.7236e-11	0.119198	11.9198	-1.4438e-05	-14.438	0.825584	2.35715
			-1.5102e-10	-2.17147e-11	0.143787	14.3787	-5.1112e-05	-51.112	0.281317	0.803198	0.350247
		2020-03-11	-3.7265e-11	-4.0152e-12	0.107747	10.7747	-1.8048e-05	-18.048	0.597004	1.25232
			-4.8901e-10	-1.66367e-11	0.0340212	3.40212	-2.0627e-05	-20.627	0.164935	0.34598
			-8.8152e-11	-1.7745e-11	0.2013	20.13	-1.8314e-05	-18.314	1.09916	2.30568
			-2.5143e-11	-2.0082e-12	0.0798711	7.98711	-3.1424e-05	-31.424	0.254172	0.533171
			-2.723e-11	-2.0151e-12	0.0740029	7.40029	-1.2336e-05	-12.336	0.599894	1.25838
			-7.2281e-11	-7.3337e-12	0.101461	10.1461	-3.6791e-05	-36.791	0.275777	0.578489
			-4.8571e-11	-4.2211e-12	0.0869058	8.69058	-2.3039e-05	-23.039	0.377212	0.791267
			-8.7153e-11	-5.7548e-12	0.066031	6.6031	-2.0328e-05	-20.328	0.324828	0.681383
			-6.2604e-11	-8.5639e-12	0.136795	13.6795	-2.2895e-05	-22.895	0.597488	1.25333	0.476719
									mean	st. dev	SEM	n								mean	st. dev	SEM	n
									0.500736	0.608356	0.0906883	45								0.138205	0.148149	0.0257895	33
		Q84C	F (mV)	DF (A)	DF/F	%DF/F	Imax						Q84C Y417V	F (mV)	DF (A)	DF/F	%DF/F	Imax
						pH 6	pH 6		DF/F / I ampl.	Normalization to the mean of each day							pH 6	pH 6		DF/F / I ampl.	Normalization to the mean of each day
							A	micro A										A	micro A
		2017-10-11	-5.065e-10	-5.082e-11	0.100336	10.0336	-3.8611e-05	-38.611	0.259863	0.645778			2017-11-23	-5.1558e-10	-1.2833e-11	0.0248904	2.48904	-4.0235e-05	-40.235	0.0618626	0.153733
			-5.0951e-10	-9.1306e-11	0.179204	17.9204	-5.2137e-05	-52.137	0.343717	0.854161				-4.8597e-10	-6.01971e-11	0.12387	12.387	-1.197e-05	-11.97	1.03484	2.57165
			-5.0904e-10	-9.9362e-11	0.195195	19.5195	-4.2372e-05	-42.372	0.460669	1.1448				-5.0255e-10	-7.6797e-11	0.152815	15.2815	-3.0483e-05	-30.483	0.501311	1.24579
			-5.1111e-10	-9.3113e-11	0.182178	18.2178	-3.3405e-05	-33.405	0.545361	1.35526	0.402403			-5.1504e-10	-1.3356e-11	0.025932	2.5932	-2.3991e-05	-23.991	0.10809	0.268613
		2019-02-28	-2.5118e-10	-5.4059e-12	0.021522	2.1522	-3.5356e-05	-35.356	0.0608723	0.287705			2019-02-28	-7.7995e-11	-9.8921e-13	0.012683	1.2683	-2.6574e-05	-26.574	0.0477271	0.225576
			-9.7222e-11	-6.4404e-12	0.0662443	6.62443	-2.779e-05	-27.79	0.238374	1.12665				-8.6736e-11	2.7709e-13	-0.00319464	-0.319464	-3.2392e-05	-32.392	-0.00986242	-0.0466135
			-1.9219e-10	-5.6793e-12	0.0295504	2.95504	-5.3905e-05	-53.905	0.0548195	0.259097				-5.7186e-11	-1.1561e-12	0.0202165	2.02165	-2.7454e-05	-27.454	0.0736377	0.348039
			-1.094e-10	-4.3955e-12	0.0401782	4.01782	-2.1868e-05	-21.868	0.183731	0.86838				-1.8216e-10	-2.6165e-12	0.0143637	1.43637	-3.9767e-05	-39.767	0.0361198	0.170715
			-2.4817e-10	-1.0667e-11	0.0429826	4.29826	-2.6825e-05	-26.825	0.160233	0.757323				-8.1027e-11	-1.3519e-12	0.0166846	1.66846	-1.3117e-05	-13.117	0.127198	0.601185
			-5.7501e-11	-5.5383e-12	0.0963166	9.63166	-1.8169e-05	-18.169	0.530115	2.50552				-6.0092e-11	-1.3523e-12	0.0225038	2.25038	-1.4606e-05	-14.606	0.154072	0.728204
			-6.6708e-11	-3.912e-12	0.0586436	5.86436	-2.2667e-05	-22.667	0.258718	1.2228				-3.8322e-10	-1.5894e-11	0.0414749	4.14749	-3.6845e-05	-36.845	0.112566	0.532028
			-6.2663e-11	-2.9954e-12	0.0478017	4.78017	-2.3231e-05	-23.231	0.205767	0.972531	0.211579			-9.1341e-11	-9.302e-13	0.0101838	1.01838	-3.6468e-05	-36.468	0.0279254	0.131986
		2020-03-11	-6.6286e-11	-7.8583e-12	0.118551	11.8551	-2.6912e-05	-26.912	0.440515	1.60076				-3.7175e-10	-1.3529e-11	0.0363927	3.63927	-2.3914e-05	-23.914	0.152182	0.719267
			-1.6765e-10	-8.2118e-12	0.0489818	4.89818	-3.3173e-05	-33.173	0.147656	0.536557				-1.35e-10	-2.8568e-12	0.0211615	2.11615	-1.6939e-05	-16.939	0.124928	0.590454
			-3.8674e-11	-8.1453e-13	0.0210614	2.10614	-1.3578e-05	-13.578	0.155114	0.563661				-6.4038e-11	-6.592e-13	0.0102939	1.02939	-2.6772e-05	-26.772	0.0384502	0.18173
			-1.1839e-10	-4.1728e-12	0.0352462	3.52462	-3.6053e-05	-36.053	0.0977622	0.355252				-5.8604e-11	-1.313e-12	0.0224046	2.24046	-3.1361e-05	-31.361	0.071441	0.337657
			-4.9022e-11	-3.3021e-12	0.0673596	6.73596	-2.1983e-05	-21.983	0.306417	1.11347				-7.6747e-11	-7.9652e-13	0.0103785	1.03785	-1.4119e-05	-14.119	0.0735074	0.347423
			-6.717e-11	-8.1074e-12	0.1207	12.07	-3.0472e-05	-30.472	0.3961	1.43936				-7.1697e-11	-6.814e-13	0.00950388	0.950388	-1.8341e-05	-18.341	0.0518177	0.24491
			-1.0246e-10	-7.4674e-12	0.0728811	7.28811	-3.4172e-05	-34.172	0.213277	0.775015			2020-03-11	-1.1738e-10	-2.10848e-12	0.0179629	1.79629	-2.5031e-05	-25.031	0.0717624	0.260773
			-4.5041e-11	-3.8287e-12	0.0850048	8.50048	-2.8999e-05	-28.999	0.29313	1.06519				-4.0721e-11	-8.083e-13	0.0198497	1.98497	-1.8841e-05	-18.841	0.105354	0.382839
			-1.2225e-10	-9.6264e-12	0.0787436	7.87436	-1.8452e-05	-18.452	0.426748	1.55073	0.275191			-5.6489e-11	-7.13333e-13	0.0126278	1.26278	-1.3498e-05	-13.498	0.0935533	0.339958
														-3.7739e-11	-5.71538e-13	0.0151445	1.51445	-2.0908e-05	-20.908	0.072434	0.263213
														-7.6554e-11	-1.41656e-12	0.0185041	1.85041	-1.9133e-05	-19.133	0.0967128	0.351439
														-1.1711e-10	-1.3989e-12	0.0119452	1.19452	-1.5549e-05	-15.549	0.0768228	0.279162
														-1.9594e-10	-2.64445e-12	0.0134962	1.34962	-8.5251e-06	-8.5251	0.158312	0.575279
														-3.2695e-11	-1.95555e-13	0.00598119	0.598119	-2.4572e-05	-24.572	0.0243415	0.088453
														-1.1847e-10	-1.79656e-12	0.0151647	1.51647	-2.5312e-05	-25.312	0.059911	0.217707
									mean	st. dev	SEM	n								mean	st. dev	SEM	n
									0.275189	0.146978	0.0320732	21								0.131371	0.202142	0.0389022	27

## Sheet: Fig4D
Kinetics of single palm Mutants at pH 6
Rise time or decay time (ms)
			Rise Time I
		pH
	A81C		2017-10-18
		6	202	146	401	344	478
	S83C		2017-10-18
		6	276	295	89	159	128	120	191
	Q84C		2017-11-29
		6	467	281	211	338	264	182	221
			Decay Time I
		pH
	A81C		2017-10-18
		6	4721	5015	5428	5187	5380
	S83C		2017-10-18
		6	1460	1382	1603	1912	2067	2294	2464
	Q84C		2017-11-29
		6	939	1098	978	886	1185	1042	919
			Riste Time F
		pH
	A81C		2017-10-18
		6	860	928	935	784	841
	S83C		2017-10-18
		6	761	1216	359	583	481	441	659
	Q84C		2017-11-29
		6	901	579	762	880	639	498	586

## Sheet: Fig4-S1
pH dependence of single palm mutants
pH50 values
				pH50 Activation I
		WT
				6.176	6.283	6.194	6.286	6.13	6.178	6.255	6.103	6.152	6.204	6.178	6.125	6.255	6.319	6.318	6.463	6.141	6.331	6.112	6.131	6.266	6.084	6.091	6.135	6.261	6.204	6.423	6.184	6.482	6.24
		A81C
				6.45	6.538	6.631	6.531	6.613
		S83C
				6.062	6.093	6.108	5.971	6.111
		Q84C
				6.379	6.484	6.347	6.365	6.277	6.205
				pH50 Inactivation I
		WT
				7.188	7.216	7.192	7.101	7.148	7.054	7.005	7.135	7.161	7.182	7.172	7.18	7.205	7.204	7.138	7.177	7.2
		A81C
				7.16	7.125	7.13	7.078	7.074
		S83C
				7.22	7.192	7.26	7.256
		Q84C
				7.151	7.182	7.169	7.149	7.181	7.183
				pH50 Activation F
		A81C
				7.228	7.036	7.096	7.065
		S83C
				7.195	7.133	7.179	7.136	7.47	7.549
		Q84C
				6.854	7.565	7.205	7.602	7.021
