# Supplementary material for: Kinetic analysis of ASIC1a delineates conformational signaling from proton-sensing domains to the channel gate
Source: eLife. 2021 Mar 17;10:e66488. doi: 10.7554/eLife.66488 (PMC8009679; doi:10.7554/eLife.66488)
Supplement: Figure 5—source data 1. [file elife-66488-fig5-data1.xlsx]

## Sheet: Fig5C
Kinetics of Intra-SU triple mutants at pH6
Rise time or decay time (ms)
		Rise Time I
	pH
A81C Y417V P205W
	6	98	111	112	124	113
S83C Y417V P205W
	6	141	62	68	77	81	72
Q84C Y417V P205W
	6	88	99	77	69	51
Q84C Y417V R206W
	6	378	298	177	238	337	242	201	182
A81C Y417V L207W
	6	255	142	160	169	282	125
Q84C Y417V L207W
	6	172	199	234	209	162	85	92	253	127	167
A81C Y417V K208W
	6		89	84	96	100	133
A81C Y417V T209W
	6	383	218	305	180
A81C Y417V M210W
	6	140	216	123	191	126	167
		Decay Time I
A81C Y417V P205W
	6	1263	1037	963	1081	883
S83C Y417V P205W
	6	558	534	618	826	741	898
Q84C Y417V P205W
	6	741	702	549	504	368
Q84C Y417V R206W
	6	543	741	899	502	803	385	783	643
A81C Y417V L207W
	6	3665	3586	3165	3788	3565	3502
Q84C Y417V L207W
	6	1880	1482	926	1205	1323	798	863	715	657	1136
A81C Y417V K208W
	6		5935	1011	5522	2446	3447
A81C Y417V T209W
	6
A81C Y417V M210W
	6	14.64	17.26	16.16	17.31	13.92	14.87
		Rise Time F
A81C Y417V P205W
	6	486	221	205	147	266
S83C Y417V P205W
	6	199	252	225	291	384	406
Q84C Y417V P205W 1st signal
	6	86	66	67	163	46
Q84C Y417V P205W 2nd signal
	6	224	206			325
Q84C Y417V R206W
	6	699	520	489	420	619	480	579	501
A81C Y417V L207W 1st signal
	6	268	80	161	138	141	186
A81C Y417V L207W 2nd signal
	6	280	401	423	348	902	283
Q84C Y417V L207W
	6	426	444	404	365	262	183	201	205	304	225
A81C Y417V K208W
	6		401	367	460	660	260
A81C Y417V T209W
	6	945	823	1220	1487
A81C Y417V M210W
	6	265	559	346	341	346	324

## Sheet: Fig5S1
Kinetics of IntraSU triple mutants at pH6.5 and 5.5
Rise time or decay time (ms)
		Rise Time I
	pH
A81C Y417V P205W
	6.5
	5.5
S83C Y417V P205W
	6.5
	5.5	89	67	73	80	100	82
Q84C Y417V P205W
	6.5
	5.5	98	111			49
Q84C Y417V R206W
	6.5	743	746	463	498	641		546	463
	5.5	279	219	139	178	221	140	200	161
A81C Y417V L207W
	6.5
	5.5	304	162	163	185	268	108
Q84C Y417V L207W
	6.5
	5.5	177	196		252	169	110	108	286	143	214
A81C Y417V K208W
	6.5	163	281	216	341	66
	5.5	138	137	113	146	122
A81C Y417V T209W
	6.5
	5.5
A81C Y417V M210W
	6.5
	5.5	128	184	126	169	123	176
		Decay Time I
A81C Y417V P205W
	6.5
	5.5
S83C Y417V P205W
	6.5
	5.5	466	500	661	761	723	836
Q84C Y417V P205W
	6.5
	5.5	781	781			365
Q84C Y417V R206W
	6.5	186	406	566	285	564		325	365
	5.5	743	779	901	601	976	524	781	760
A81C Y417V L207W
	6.5
	5.5	4765	5125	4582	4387	5624	5002
Q84C Y417V L207W
	6.5
	5.5	1884	1603		1220	1445	866	922	729	740	1086
A81C Y417V K208W
	6.5	2128	1608	859	2068	307
	5.5	7467	8153	1701	8189	1706
A81C Y417V T209W
	6.5
	5.5
A81C Y417V M210W
	6.5
	5.5	15.24	19.87	14.76	15.98	13.38	14.46
		Rise Time F
A81C Y417V P205W
	6.5
	5.5
S83C Y417V P205W
	6.5
	5.5	597	272	204	712	459	367
Q84C Y417V P205W 1st signal
	6.5
	5.5	86	127			65
Q84C Y417V P205W 2nd signal
	6.5
	5.5	224	206			325
Q84C Y417V R206W
	6.5	760	901	754	590	716	741	809	757
	5.5	680	440	359	381	399	516	582	460
A81C Y417V L207W 1st signal
	6.5
	5.5	124	187	162	179	158	122
A81C Y417V L207W 2nd signal
	6.5
	5.5		456	664	517	506	248
Q84C Y417V L207W
	6.5
	5.5	288	520		320	261	167	144	185	661	274
A81C Y417V K208W
	6.5	1246	983	1848	882
	5.5	279	281	240	272	542
A81C Y417V T209W
	6.5
	5.5	645	475	763	783
A81C Y417V M210W
	6.5
	5.5	279	543	342	343	379	246
