# Supplementary material for: Kinetic analysis of ASIC1a delineates conformational signaling from proton-sensing domains to the channel gate
Source: eLife. 2021 Mar 17;10:e66488. doi: 10.7554/eLife.66488 (PMC8009679; doi:10.7554/eLife.66488)
Supplement: Figure 6—source data 1. [file elife-66488-fig6-data1.xlsx]

## Sheet: Fig6C-kinetics
Kinetics of Inter-SU triple mutants at pH6
Rise time or decay time (ms)
		Rise Time I
	pH
A81C Y417V T289W
	6	262	184	268	267	255	358
S83C Y417V T289W
	6	161	160	146	230	226
Q84C Y417V T289W
	6	141	154	188	140	193
S83C Y417V D357W
	6	84	129	63	104	65		104
S83C Y417V Q358W
	6	195	245	122	257	222	358	321
S83C Y417V E359W
	6	367	359	343	397	345
A81C Y417V L369W
	6	111	189	288	140	132	159
S83C Y417V L369W
	6	119	101	88	140
		Decay Time I
A81C Y417V T289W
	6	3041	2379	1520	1212	1212	1560
S83C Y417V T289W
	6	1340	1377	1133	795	825
Q84C Y417V T289W
	6	1058	1013	1016	807	926
S83C Y417V D357W
	6	303		125	287	188		408
S83C Y417V Q358W
	6	1185	860	1201	1002	1401	1180	1202
S83C Y417V E359W
	6	1800	1500	1369	1641	2521
A81C Y417V L369W
	6	883	1067	1468	1265	1608	1487
S83C Y417V L369W
	6	1080	1121	941	1502
		Rise Time F
A81C Y417V T289W
	6	503	303	523	483	592	463
S83C Y417V T289W
	6	253	148	183	148	124
Q84C Y417V T289W
	6	266	285	447	225	563
S83C Y417V D357W 1st signal
	6	127	332	78	246	291	278	335
S83C Y417V D357W 2nd signal
	6	207	1470	438	1069	1752
S83C Y417V Q358W 1st signal
	6	137		181	170	170	223	264
S83C Y417V Q358W 2nd signal
	6	592	1419	822	936	821	753	909
S83C Y417V E359W
	6	272	392	569	499	282
A81C Y417V L369W 1st signal
	6	143	136	183	122	121	104
A81C Y417V L369W 2nd signal
	6	1007	1277	862	983	1007	1145
S83C Y417V L369W 1st signal
	6	62	62	104	105
S83C Y417V L369W 2nd signal
	6	464	545	484	686

## Sheet: Fig6-S1-kinetics
Kinetics of Inter-SU triple mutants at pH6.5 and 5.5
Rise time or decay time (ms)
		Rise Time I
	pH
A81C Y417V T289W
	6.5	480	321	493	526	540	566
	5.5	203	161	253	268	295	349
S83C Y417V T289W
	6.5	399	149	316	327	361
	5.5	176	167	149	235	200
Q84C Y417V T289W
	6.5	353	344	407		558
	5.5	118	124	154	123	156
S83C Y417V D357W
	6.5
	5.5	71	62	66	73	79	47	142	63
S83C Y417V Q358W
	6.5	272		260		324	556	677
	5.5	118	185	93	160	199	236	322
S83C Y417V E359W
	6.5	529	424	421	426	639
	5.5	273	304	352	383	400
A81C Y417V L369W
	6.5	449	465	336	433	406
	5.5	151	197	139	217	173
S83C Y417V L369W
	6.5	237	204	220	259
	5.5	121	101	102	85
		Decay Time I
A81C Y417V T289W
	6.5	2019	1660	1277	1093	1091	1370
	5.5	3480	2662	1766	1644	1735	1724
S83C Y417V T289W
	6.5	1174	921	985	761	778
	5.5	1788	1765	1650	1157	1332
Q84C Y417V T289W
	6.5	896	755	770		777
	5.5	1043	1118	1222	1340	1243
S83C Y417V D357W
	6.5
	5.5	405	164	204	547	343	286	466	527
S83C Y417V Q358W
	6.5	945		900		1061	982	923
	5.5	1200	1011	1260	1001	1421	1459	1563
S83C Y417V E359W
	6.5	1249	1042	925	1102	1441
	5.5	2345	2140	1792	2260	3063
A81C Y417V L369W
	6.5	8883	8786	740	1084	1086
	5.5	9408	9363	3131	4782	4329
S83C Y417V L369W
	6.5	921	781	759	1083
	5.5	1401	1462	1781	1758
		Rise Time F
A81C Y417V T289W
	6.5	669	492	824	683	983	627
	5.5	381	229	643	563	723	884
S83C Y417V T289W
	6.5	667	109	484	230	247
	5.5	243	129	247	189	143
Q84C Y417V T289W
	6.5	428	467	767	403	803
	5.5	263	209	402	204	348
S83C Y417V D357W 1st signal
	6.5
	5.5	79	221		230	183	303	260	172
S83C Y417V D357W 2nd signal
	6.5
	5.5		843		442	1058
S83C Y417V Q358W 1st signal
	6.5			296		214	239
	5.5	95		98	175	151	164	291
S83C Y417V Q358W 2nd signal
	6.5	494	1410	855	1774	1010	1014	1270
	5.5	608	1309	792	717	566	300	255
S83C Y417V E359W
	6.5	393	833	662	883	767
	5.5	130	281	286	350	226
A81C Y417V L369W 1st signal
	6.5	83	323
	5.5	68	183	23	23
A81C Y417V L369W 2nd signal
	6.5	266	926	398	306
	5.5	835	1080	275	75	211
S83C Y417V L369W 1st signal
	6.5				566
	5.5	98	94	142	83
S83C Y417V L369W 2nd signal
	6.5	2144		824	926
	5.5	212	483	484	645

## Sheet: Fig6-S3-pH50
pH50 values palm mutants
	Activation current
A81C Y417V P205W	5.762	6.018	5.624	5.927	5.895	5.505
S83C Y417V P205W	6.164	6.063	6.229	6.073
Q84C Y417V P205W 1st signal	5.958	5.631	5.147	5.551
Q84C Y417V R206W	6.181	5.911	6.169	5.883
A81C Y417V L207W 1st signal	6.036	5.933	5.727	6.131
Q84C Y417V L207W	5.631	5.409	5.305	5.856
A81C Y417V K208W	5.98	5.924	5.95	5.862
A81C Y417V T209W	5.041	5.132	5.23	5.203	5.171
A81C Y417V M210W					6.383	5.951	6.227	6.229	6.362
A81C Y417V T289W					6.475	6.121	6.047	6.054	6.285
S83C Y417V T289W	6.213	6.284	6.331	6.238	6.005	6.082	6.088	6.088	5.951	5.791
Q84C Y417V T289W	6.201	5.705	6.191	6.425	5.887	6.194	5.647
S83C Y417V D357W 1st signal	4.976	5.017	5.409	5.201	5.395	4.893	4.864
S83C Y417V Q358W 1st signal	6.17	6.114	6.057	6.023	5.78	5.368	5.955	5.794
S83C Y417V E359W	6.191	6.319	6.455	6.256
A81C Y417V L369W 1st signal	6.123	6.142	6.248	5.993
S83C Y417V L369W 1st signal	5.956	5.84	5.903	5.965
	SSD current
hASIC1a-212G-wt	7.308	7.345	7.495
A81C Y417V P205W	7.356	7.499	7.562	7.345	7.384
S83C Y417V P205W	7.248	7.264	7.212	7.265
Q84C Y417V P205W	7.307	7.456	7.396	7.251	7.191	7.196	7.205	7.194
Q84C Y417V R206W	7.245	7.244	7.27	7.274
A81C Y417V L207W	7.408	7.32	7.328	7.328
Q84C Y417V L207W	7.249	7.27	7.327	7.325	7.155	7.127	7.114	7.111
A81C Y417V K208W	7.56	7.442	7.369	7.43
A81C Y417V T209W	(sustained I)
A81C Y417V M210W	7.556	7.287	7.341	7.275	7.231
A81C Y417V T289W	7.356	7.345	7.383	7.354
S83C Y417V T289W	7.45	7.39	7.37	7.456
Q84C Y417V T289W	7.336	7.33	7.338	7.318
S83C Y417V D357W	7.068	7.125	6.906	6.984	6.976	6.934
S83C Y417V Q358W	7.285	7.259	7.286	7.256
S83C Y417V E359W	7.121	7.107	7.173	7.145
A81C Y417V L369W	7.249	7.206	7.21	7.247	7.171
S83C Y417V L369W	7.114	7.063	7.119
	Fluorescence
A81C Y417V P205W
S83C Y417V P205W	5.374		5.486		5.242		5.285
Q84C Y417V P205W 1st signal
Q84C Y417V R206W	6.003		6.356		5.984		6.016		6.143
A81C Y417V L207W 1st signal	6.945		6.458		6.455		5.529
Q84C Y417V L207W	5.564		5.734		5.965		6.031
A81C Y417V K208W	6.312		6.389
A81C Y417V T209W	5.912		6.442		6.257		6.587
A81C Y417V M210W	7.315		6.929		7.235		6.865
A81C Y417V T289W	7.468		7.38		7.562		7.219
S83C Y417V T289W	6.771		7.139		6.962		6.882		6.882
Q84C Y417V T289W	6.911		6.658		6.743		7.429
S83C Y417V D357W 1st signal
S83C Y417V Q358W 1st signal	6.972		6.55		6.95		6.952
S83C Y417V E359W	7.17		6.353		6.641		6.848
A81C Y417V L369W 1st signal	7.089		6.795		6.568
S83C Y417V L369W 1st signal

## Sheet: Fig6-S4-pH50-kinetics
Correlation of pH shift with kinetics
RTF/RTI	rise time fluorescence/rise time current activation
pH50F-pH50A	pH50 fluorescence - pH50 current activation
	RTF/RTI	pH50F-pH50A
E63C	0.45951	0.705
H70C	0.761278	0.36555
Y71C	1.10512	0.80325
H72C	0.972739	0.119625
T419C	1.42235	-0.3881
K424C	1.06905	0.229143
A425C	0.667776	0.27875
I428C	1.20296	0.3738
K105C	0.953595	0.720225
K133C	1.10291	0.608082
I137C	1.53383	0.599225
E235C	1.62343	0.6371
E355C	0.954515	0.127667
K388C	1.63391	0.523398
Y389C	1.5575	0.944095
K392C	2.85119	0.553796
A81C	3.39675	0.55365
S83C	3.63753	1.208
Q84C	2.57329	0.906567
A81C Y417V P205W	2.464	-0.44175
Q84C Y417V R206W	2.1969	0.0644
A81C Y417V L207W	0.904196	0.39
Q84C Y417V L207W	1.86871	0.27325
A81C Y417V K208W	4.44424	0.4215
A81C Y417V T209W	4.62593	1.1441
A81C Y417V M210W	2.29422	0.8556
A81C Y417V T289W	1.82366	1.21085
S83C Y417V T289W	0.988401	0.8201
Q84C Y417V T289W	2.12782	0.899536
S83C Y417V Q358W	0.843125	0.948375
S83C Y417V E359W	1.11326	0.44775
