# Supplementary material for: Kinetic analysis of ASIC1a delineates conformational signaling from proton-sensing domains to the channel gate
Source: eLife. 2021 Mar 17;10:e66488. doi: 10.7554/eLife.66488 (PMC8009679; doi:10.7554/eLife.66488)
Supplement: Figure 7—source data 1. [file elife-66488-fig7-data1.xlsx]

## Sheet: fig7.abc.dataframe
Average distances in Å are indicated for the indicated residue pairs
time_ns	S83_Q358_A	S83_Q358_B	S83_Q358_C	S83_E359_A	S83_E359_B	S83_E359_C	K211_E359_A	K211_E359_B	K211_E359_C
1	8.078	4.697	7.078	5.436	4.418	4.98	17.566	16.887	15.851
2	8.078	4.697	7.078	5.436	4.418	4.98	17.566	16.887	15.851
3	6.135	6.372	6.605	6.798	6.882	5.18	16.906	18.923	17.454
4	6.135	6.372	6.605	6.798	6.882	5.18	16.906	18.923	17.454
5	7.74	5.906	3.074	8.747	8.07	9.96	21.347	16.839	15.87
6	7.74	5.906	3.074	8.747	8.07	9.96	21.347	16.839	15.87
7	7.968	4.868	4.638	7.253	8.209	9.123	19.036	17.716	17.269
8	7.968	4.868	4.638	7.253	8.209	9.123	19.036	17.716	17.269
9	5.345	5.823	4.907	9.229	8.617	10.773	19.879	17.453	16.05
10	5.345	5.823	4.907	9.229	8.617	10.773	19.879	17.453	16.05
11	5.787	5.588	3.994	7.544	4.901	12.774	19.674	17.783	20.892
12	5.787	5.588	3.994	7.544	4.901	12.774	19.674	17.783	20.892
13	3.535	5.838	4.718	9.03	4.723	12.454	22.206	16.097	21.409
14	3.535	5.838	4.718	9.03	4.723	12.454	22.206	16.097	21.409
15	5.184	6.448	6.678	10.539	3.367	11.94	22.792	15.041	20.398
16	5.184	6.448	6.678	10.539	3.367	11.94	22.792	15.041	20.398
17	6.764	7.352	4.912	7.323	5.494	11.151	21.091	17.259	14.395
18	6.764	7.352	4.912	7.323	5.494	11.151	21.091	17.259	14.395
19	6.033	3.733	5.473	8.461	5.493	13.943	21.22	17.679	19.751
20	6.033	3.733	5.473	8.461	5.493	13.943	21.22	17.679	19.751
21	6.579	6.416	5.227	5.332	4.696	9.156	16.851	16.458	20.582
22	6.579	6.416	5.227	5.332	4.696	9.156	16.851	16.458	20.582
23	5.132	4.551	5.502	8.502	8.246	4.97	20.803	16.797	11.329
24	5.132	4.551	5.502	8.502	8.246	4.97	20.803	16.797	11.329
25	4.852	5.225	6.009	9.505	7.928	6.971	22.105	19.167	11.875
26	4.852	5.225	6.009	9.505	7.928	6.971	22.105	19.167	11.875
27	6.346	6.55	5.468	8.237	7.484	6.415	21.234	17.363	11.598
28	6.346	6.55	5.468	8.237	7.484	6.415	21.234	17.363	11.598
29	6.441	5.764	5.943	8.255	7.214	6.243	20.165	19.901	11.333
30	6.441	5.764	5.943	8.255	7.214	6.243	20.165	19.901	11.333
31	9.64	4.733	7.497	11.496	6.843	6.083	19.77	18.138	11.207
32	9.64	4.733	7.497	11.496	6.843	6.083	19.77	18.138	11.207
33	7.103	4.46	6.8	9.806	4.332	9.948	21.85	14.59	13.608
34	7.103	4.46	6.8	9.806	4.332	9.948	21.85	14.59	13.608
35	5.73	7.509	6.816	9.029	5.12	5.513	21.062	15.251	11.619
36	5.73	7.509	6.816	9.029	5.12	5.513	21.062	15.251	11.619
37	4.679	7.286	6.635	12.298	7.169	8.719	21.574	17.782	12.741
38	4.679	7.286	6.635	12.298	7.169	8.719	21.574	17.782	12.741
39	6.313	6.687	5.868	10.304	7.04	7.307	21.143	17.444	12.38
40	6.313	6.687	5.868	10.304	7.04	7.307	21.143	17.444	12.38
41	8.317	9.151	6.259	15.853	7.901	5.05	25.344	16.737	10.788
42	8.317	9.151	6.259	15.853	7.901	5.05	25.344	16.737	10.788
43	6.101	6.144	9.149	10.495	5.278	5.04	22.048	19.022	10.948
44	6.101	6.144	9.149	10.495	5.278	5.04	22.048	19.022	10.948
45	5.269	4.084	8.001	10.123	5.151	5.091	21.544	18.372	10.531
46	5.269	4.084	8.001	10.123	5.151	5.091	21.544	18.372	10.531
47	3.948	5.535	7.733	12.306	8.242	6.51	19.207	19.956	11.721
48	3.948	5.535	7.733	12.306	8.242	6.51	19.207	19.956	11.721
49	4.197	3.363	6.226	12.763	7.527	5.966	20.52	17.637	11.351
50	4.197	3.363	6.226	12.763	7.527	5.966	20.52	17.637	11.351
51	5.952	4.941	7.016	6.738	7.3	5.091	11.33	17.94	10.672
52	5.952	4.941	7.016	6.738	7.3	5.091	11.33	17.94	10.672
53	5.743	4.84	4.274	6.956	7.049	5.415	11.357	18.418	11.399
54	5.743	4.84	4.274	6.956	7.049	5.415	11.357	18.418	11.399
55	6.292	7.397	4.988	3.747	9.653	7.498	11.063	18.392	18.239
56	6.292	7.397	4.988	3.747	9.653	7.498	11.063	18.392	18.239
57	7.547	5.335	6.559	3.598	6.133	8.812	11.748	16.432	19.34
58	7.547	5.335	6.559	3.598	6.133	8.812	11.748	16.432	19.34
59	4.55	8.218	6.865	12.459	7.871	5.455	22.494	17.681	16.618
60	4.55	8.218	6.865	12.459	7.871	5.455	22.494	17.681	16.618
61	5.646	5.07	6.965	11.25	6.525	6.376	21.735	18.629	15.164
62	5.646	5.07	6.965	11.25	6.525	6.376	21.735	18.629	15.164
63	6.114	5.105	6.157	11.968	5.466	10.433	19.92	17.683	13.605
64	6.114	5.105	6.157	11.968	5.466	10.433	19.92	17.683	13.605
65	8.453	4.157	7.845	5.447	5.731	5.055	11.243	16.816	16.385
66	8.453	4.157	7.845	5.447	5.731	5.055	11.243	16.816	16.385
67	7.611	5.851	6.653	7.445	4.656	10.706	13.502	17.978	18.885
68	7.611	5.851	6.653	7.445	4.656	10.706	13.502	17.978	18.885
69	7.646	5.99	9.158	6.699	7.548	11.563	15.625	18.745	19.049
70	7.646	5.99	9.158	6.699	7.548	11.563	15.625	18.745	19.049
71	5.803	5.749	12.798	10.214	5.82	5.149	19.961	16.252	14.745
72	5.803	5.749	12.798	10.214	5.82	5.149	19.961	16.252	14.745
73	6.557	5.85	10.164	3.533	8.349	3.851	13.933	19.144	16.133
74	6.557	5.85	10.164	3.533	8.349	3.851	13.933	19.144	16.133
75	6.427	6.259	11.502	3.689	5.463	4.89	13.868	17.201	16.388
76	6.427	6.259	11.502	3.689	5.463	4.89	13.868	17.201	16.388
77	6.502	5.986	8.554	4.988	4.426	10.766	13.82	16.434	19.371
78	6.502	5.986	8.554	4.988	4.426	10.766	13.82	16.434	19.371
79	6.102	4.506	9.617	4.393	5.084	8.603	13.098	17.501	16.786
80	6.102	4.506	9.617	4.393	5.084	8.603	13.098	17.501	16.786
81	6.861	4.317	7.22	5.982	7.292	7.788	13.837	18.234	18.382
82	6.861	4.317	7.22	5.982	7.292	7.788	13.837	18.234	18.382
83	6.193	6.428	8.858	5.721	8.792	3.089	13.939	18.549	14.702
84	6.193	6.428	8.858	5.721	8.792	3.089	13.939	18.549	14.702
85	6.999	4.622	9.659	3.81	11.407	7.567	13.932	20.15	17.815
86	6.999	4.622	9.659	3.81	11.407	7.567	13.932	20.15	17.815
87	4.861	5.299	9.239	4.318	8.251	9.296	11.455	20.023	15.372
88	4.861	5.299	9.239	4.318	8.251	9.296	11.455	20.023	15.372
89	5.3	4.772	8.294	4.201	10.81	8.474	12.02	20.939	14.232
90	5.3	4.772	8.294	4.201	10.81	8.474	12.02	20.939	14.232
91	5.336	7.177	9.324	3.531	9.182	5.649	10.387	19.927	13.671
92	5.336	7.177	9.324	3.531	9.182	5.649	10.387	19.927	13.671
93	5.948	6.919	8.708	5.859	10.087	7.958	15.627	15.376	15.872
94	5.948	6.919	8.708	5.859	10.087	7.958	15.627	15.376	15.872
95	6.243	6.863	9.125	8.01	12.157	5.422	16.132	18.108	15.235
96	6.243	6.863	9.125	8.01	12.157	5.422	16.132	18.108	15.235
97	5.499	5.938	9.222	5.284	8.533	5.824	14.267	18.023	13.859
98	5.499	5.938	9.222	5.284	8.533	5.824	14.267	18.023	13.859
99	5.717	4.92	9.652	7.363	11.442	8.178	18.342	19.201	15.077
100	5.717	4.92	9.652	7.363	11.442	8.178	18.342	19.201	15.077
101	5.851	6.377	10.918	8.279	7.675	9.185	14.362	18.776	15.435
102	5.851	6.377	10.918	8.279	7.675	9.185	14.362	18.776	15.435
103	5.289	4.288	9.868	8.059	8.922	8.521	14.905	18.626	12.707
104	5.289	4.288	9.868	8.059	8.922	8.521	14.905	18.626	12.707
105	9.372	6.486	10.518	5.258	10.787	9.878	14.945	21.112	15.79
106	9.372	6.486	10.518	5.258	10.787	9.878	14.945	21.112	15.79
107	6.429	6.43	10.794	7.542	8.31	11.019	13.533	19.502	17.992
108	6.429	6.43	10.794	7.542	8.31	11.019	13.533	19.502	17.992
109	7.439	8.61	10.289	8.505	9.806	5.409	13.147	19.452	15.795
110	7.439	8.61	10.289	8.505	9.806	5.409	13.147	19.452	15.795
111	6.882	6.004	7.428	3.605	8.82	8.208	10.564	17.737	16.337
112	6.882	6.004	7.428	3.605	8.82	8.208	10.564	17.737	16.337
113	6.296	9.596	12.091	5.476	11.717	7.814	15.861	19.489	14.137
114	6.296	9.596	12.091	5.476	11.717	7.814	15.861	19.489	14.137
115	5.851	10.081	9.305	5.099	12.19	2.842	14.505	19.819	13.574
116	5.851	10.081	9.305	5.099	12.19	2.842	14.505	19.819	13.574
117	6.184	7.266	8.373	5.151	11.855	7.045	14.152	18.256	16.535
118	6.184	7.266	8.373	5.151	11.855	7.045	14.152	18.256	16.535
119	6.374	4.775	9.738	5.045	10.479	7.295	13.212	20.438	12.77
120	6.374	4.775	9.738	5.045	10.479	7.295	13.212	20.438	12.77
121	4.542	4.816	9.726	8.58	9.345	5.741	18.092	18.178	11.44
122	4.542	4.816	9.726	8.58	9.345	5.741	18.092	18.178	11.44
123	4.644	5.181	8.497	10.836	9.622	9.675	20.427	19.966	16.283
124	4.644	5.181	8.497	10.836	9.622	9.675	20.427	19.966	16.283
125	5.24	5.889	9.834	7.15	9.148	5.15	11.42	20.659	14.662
126	5.24	5.889	9.834	7.15	9.148	5.15	11.42	20.659	14.662
127	3.939	6.432	9.766	8.351	9.766	5.831	19.055	18.368	15.668
128	3.939	6.432	9.766	8.351	9.766	5.831	19.055	18.368	15.668
129	5.127	5.342	9.225	5.435	8.838	9.104	12.443	20.117	15.986
130	5.127	5.342	9.225	5.435	8.838	9.104	12.443	20.117	15.986
131	8.559	5.456	8.165	5.445	10.671	8.385	12.293	18.313	17.495
132	8.559	5.456	8.165	5.445	10.671	8.385	12.293	18.313	17.495
133	9.116	3.515	10.035	7.556	6.532	5.223	12.261	18.47	15.387
134	9.116	3.515	10.035	7.556	6.532	5.223	12.261	18.47	15.387
135	5.686	6.762	9.692	9.309	5.674	5.8	12.68	13.161	16.066
136	5.686	6.762	9.692	9.309	5.674	5.8	12.68	13.161	16.066
137	10.284	3.944	8.616	10.134	7.784	5.336	11.117	19.617	15.627
138	10.284	3.944	8.616	10.134	7.784	5.336	11.117	19.617	15.627
139	6.767	4.954	9.729	4.184	12.588	5.446	11.195	20.089	14.136
140	6.767	4.954	9.729	4.184	12.588	5.446	11.195	20.089	14.136
141	5.827	6.488	10.393	5.346	12.914	5.401	11.268	18.505	16.96
142	5.827	6.488	10.393	5.346	12.914	5.401	11.268	18.505	16.96
143	7.03	8.214	9.813	4.58	15.696	6.128	11.399	18.15	16.395
144	7.03	8.214	9.813	4.58	15.696	6.128	11.399	18.15	16.395
145	8.022	8.646	8.986	6.951	11.273	6.39	11.511	17.883	15.799
146	8.022	8.646	8.986	6.951	11.273	6.39	11.511	17.883	15.799
147	4.924	8.605	9.487	8.517	10.662	5.893	18.133	17.714	15.279
148	4.924	8.605	9.487	8.517	10.662	5.893	18.133	17.714	15.279
149	5.161	8.973	9.026	10.589	13.15	5.066	17.295	20.482	15.07
150	5.161	8.973	9.026	10.589	13.15	5.066	17.295	20.482	15.07
151	6.644	8.772	9.178	6.008	12.62	7.381	18.261	21.502	17.023
152	6.644	8.772	9.178	6.008	12.62	7.381	18.261	21.502	17.023
153	5.102	9.217	9.489	8.214	10.84	5.652	14.767	19.82	16.51
154	5.102	9.217	9.489	8.214	10.84	5.652	14.767	19.82	16.51
155	6.16	13.358	7.091	6.903	17.093	6.888	11.244	21.728	16.2
156	6.16	13.358	7.091	6.903	17.093	6.888	11.244	21.728	16.2
157	6.951	13.699	7.316	6.421	15.898	6.403	11.795	20.966	16.542
158	6.951	13.699	7.316	6.421	15.898	6.403	11.795	20.966	16.542
159	5.18	11.077	7.393	9.122	15.064	5.219	11.401	22.236	15.694
160	5.18	11.077	7.393	9.122	15.064	5.219	11.401	22.236	15.694
161	5.535	12.193	7.546	5.671	14.394	5.321	11.163	21.271	16.836
162	5.535	12.193	7.546	5.671	14.394	5.321	11.163	21.271	16.836
163	5.468	12.442	7.312	7.928	15.735	5.69	12.821	22.816	16.46
164	5.468	12.442	7.312	7.928	15.735	5.69	12.821	22.816	16.46
165	5.469	12.102	7.541	6.465	13.951	6.078	11.521	21.143	15.283
166	5.469	12.102	7.541	6.465	13.951	6.078	11.521	21.143	15.283
167	4.872	13.754	7.28	5.45	16.087	4.937	10.694	19.633	15.336
168	4.872	13.754	7.28	5.45	16.087	4.937	10.694	19.633	15.336
169	6.066	11.112	7.483	5.614	14.6	5.471	11.603	21.351	16.091
170	6.066	11.112	7.483	5.614	14.6	5.471	11.603	21.351	16.091
171	5.759	10.457	8.768	5.669	14.241	4.325	10.82	22.534	15.544
172	5.759	10.457	8.768	5.669	14.241	4.325	10.82	22.534	15.544
173	5.31	9.174	10.799	6.13	13.951	10.449	11.384	19.633	18.721
174	5.31	9.174	10.799	6.13	13.951	10.449	11.384	19.633	18.721
175	5.934	9.201	8.994	3.369	12.506	6.339	10.138	20.721	17.321
176	5.934	9.201	8.994	3.369	12.506	6.339	10.138	20.721	17.321
177	6.981	10.607	9.148	4.82	14.92	5.226	10.799	23.213	16.289
178	6.981	10.607	9.148	4.82	14.92	5.226	10.799	23.213	16.289
179	5.497	8.607	9.33	5.217	12.171	7.37	10.068	21.732	14.284
180	5.497	8.607	9.33	5.217	12.171	7.37	10.068	21.732	14.284
181	6.277	9.073	9.445	5.285	15.588	4.53	11.724	21.175	12.278
182	6.277	9.073	9.445	5.285	15.588	4.53	11.724	21.175	12.278
183	6.385	6.442	8.643	3.862	12.014	4.134	10.876	21.278	16.297
184	6.385	6.442	8.643	3.862	12.014	4.134	10.876	21.278	16.297
185	5.953	8.627	9.582	5.101	15.515	8.684	10.516	21.551	16.08
186	5.953	8.627	9.582	5.101	15.515	8.684	10.516	21.551	16.08
187	6.566	10.571	8.171	5.112	14.39	9.972	10.306	20.77	15.862
188	6.566	10.571	8.171	5.112	14.39	9.972	10.306	20.77	15.862
189	6.29	8.707	9.083	6.11	14.411	7.938	11.221	21.776	16.663
190	6.29	8.707	9.083	6.11	14.411	7.938	11.221	21.776	16.663
191	6.469	11.921	7.882	4.783	15.301	6.712	11.229	22.033	17.068
192	6.469	11.921	7.882	4.783	15.301	6.712	11.229	22.033	17.068
193	6.453	8.72	7.647	5.384	14.972	5.921	10.713	22.501	15.818
194	6.453	8.72	7.647	5.384	14.972	5.921	10.713	22.501	15.818
195	6.168	12.066	8.177	6.125	16.794	7.838	10.901	23.197	15.636
196	6.168	12.066	8.177	6.125	16.794	7.838	10.901	23.197	15.636
197	6.31	8.231	7.833	4.636	10.446	6.307	10.802	18.983	16.063
198	6.31	8.231	7.833	4.636	10.446	6.307	10.802	18.983	16.063
199	6.238	6.837	9.188	4.753	10.083	6.679	11.682	22.429	16.448
200	6.238	6.837	9.188	4.753	10.083	6.679	11.682	22.429	16.448
201	7.279	9.595	9.248	6.278	10.169	10.318	12.389	22.439	16.157
202	7.279	9.595	9.248	6.278	10.169	10.318	12.389	22.439	16.157
203	6.823	9.206	8.349	4.86	16.858	8.35	10.474	20.336	15.08
204	6.823	9.206	8.349	4.86	16.858	8.35	10.474	20.336	15.08
205	6.332	10.632	9.346	5.155	15.196	3.518	11.066	22.282	13.914
206	6.332	10.632	9.346	5.155	15.196	3.518	11.066	22.282	13.914
207	5.846	7.676	9.575	4.893	11.063	3.431	11.696	21.75	14.649
208	5.846	7.676	9.575	4.893	11.063	3.431	11.696	21.75	14.649
209	6.039	7.102	10.41	8.189	10.973	5.695	12.296	22.253	16.79
210	6.039	7.102	10.41	8.189	10.973	5.695	12.296	22.253	16.79
211	7.875	9.83	9.384	9.603	12.142	8.381	12.836	22.767	17.225
212	7.875	9.83	9.384	9.603	12.142	8.381	12.836	22.767	17.225
213	6.196	9.148	8.126	6.292	11.891	9.188	12.084	21.604	14.87
214	6.196	9.148	8.126	6.292	11.891	9.188	12.084	21.604	14.87
215	6.767	7.565	9.878	6.742	8.679	5.224	12.166	21.716	15.168
216	6.767	7.565	9.878	6.742	8.679	5.224	12.166	21.716	15.168
217	7.787	7.72	8.806	5.787	11.401	8.123	11.792	22.387	15.85
218	7.787	7.72	8.806	5.787	11.401	8.123	11.792	22.387	15.85
219	8.465	9.559	8.069	4.76	11.517	6.921	12.057	21.221	15.934
220	8.465	9.559	8.069	4.76	11.517	6.921	12.057	21.221	15.934
221	7.492	8.034	9.955	6.334	11.373	6.168	12.18	22.378	15.111
222	7.492	8.034	9.955	6.334	11.373	6.168	12.18	22.378	15.111
223	9.291	8.094	11.581	5.958	11.475	9.453	11.818	22.81	17.697
224	9.291	8.094	11.581	5.958	11.475	9.453	11.818	22.81	17.697
225	9.897	8.435	8.546	4.872	10.133	7.571	13.863	21.027	17.534
226	9.897	8.435	8.546	4.872	10.133	7.571	13.863	21.027	17.534
227	9.238	9.437	9.341	5.506	9.411	8.559	12.192	20.449	15.983
228	9.238	9.437	9.341	5.506	9.411	8.559	12.192	20.449	15.983
229	8.734	10.901	7.717	7.939	12.264	6.687	12.089	22.191	16.937
230	8.734	10.901	7.717	7.939	12.264	6.687	12.089	22.191	16.937
231	9.226	9.693	9.671	5.668	8.79	6.008	11.35	18.953	15.404
232	9.226	9.693	9.671	5.668	8.79	6.008	11.35	18.953	15.404
233	8.45	7.041	9.142	6.027	4.431	6.279	11.409	12.029	15.741
234	8.45	7.041	9.142	6.027	4.431	6.279	11.409	12.029	15.741
235	5.559	6.777	9.559	6.979	6.718	6.041	12.379	11.471	16.673
236	5.559	6.777	9.559	6.979	6.718	6.041	12.379	11.471	16.673
237	8.128	9.777	9.161	4.346	4.506	4.613	11.454	11.495	17.255
238	8.128	9.777	9.161	4.346	4.506	4.613	11.454	11.495	17.255
239	7.611	7.503	9.045	5.399	4.035	6.584	11.088	12.571	16.846
240	7.611	7.503	9.045	5.399	4.035	6.584	11.088	12.571	16.846
241	10.445	9.48	9.859	3.084	7.677	7.086	10.708	9.196	16.32
242	10.445	9.48	9.859	3.084	7.677	7.086	10.708	9.196	16.32
243	10.696	12.958	9.022	5.3	7.615	6.572	12.21	8.262	16.21
244	10.696	12.958	9.022	5.3	7.615	6.572	12.21	8.262	16.21
245	7.379	10.115	9.885	6.289	5.392	5.948	12.04	10.116	16.454
246	7.379	10.115	9.885	6.289	5.392	5.948	12.04	10.116	16.454
247	5.773	8.174	9.747	5.794	5.77	6.144	11.694	11.171	16.574
248	5.773	8.174	9.747	5.794	5.77	6.144	11.694	11.171	16.574
249	9.195	12.188	8.676	6.509	6.558	7.48	11.927	7.341	16.241
250	9.195	12.188	8.676	6.509	6.558	7.48	11.927	7.341	16.241
251	5.285	6.799	9.003	5.536	5.87	5.448	14.114	9.926	16.886
252	5.285	6.799	9.003	5.536	5.87	5.448	14.114	9.926	16.886
253	6.738	8.197	9.732	6.271	5.021	8.137	12.464	10.853	16.843
254	6.738	8.197	9.732	6.271	5.021	8.137	12.464	10.853	16.843
255	5.392	4.34	8.986	6.264	5.383	5.372	13.142	9.841	16.852
256	5.392	4.34	8.986	6.264	5.383	5.372	13.142	9.841	16.852
257	5.953	7.395	8.894	5.571	5.366	6.72	12.202	9.688	17.019
258	5.953	7.395	8.894	5.571	5.366	6.72	12.202	9.688	17.019
259	7.542	3.509	7.32	4.504	5.319	6.364	12.064	8.5	16.596
260	7.542	3.509	7.32	4.504	5.319	6.364	12.064	8.5	16.596
261	6.642	4.86	8.968	4.822	6.092	6.293	11.706	10.239	16.51
262	6.642	4.86	8.968	4.822	6.092	6.293	11.706	10.239	16.51
263	6.086	10.339	8.102	4.996	5.666	6.097	11.322	11.999	17.015
264	6.086	10.339	8.102	4.996	5.666	6.097	11.322	11.999	17.015
265	5.282	3.81	9.54	5.03	6.698	9.87	10.104	11.715	17.694
266	5.282	3.81	9.54	5.03	6.698	9.87	10.104	11.715	17.694
267	6.183	3.641	10.099	6.788	7.395	6.911	11.57	9.189	15.566
268	6.183	3.641	10.099	6.788	7.395	6.911	11.57	9.189	15.566
269	7.378	13.509	6.285	5.463	7.585	9.881	11.864	16.928	16.288
270	7.378	13.509	6.285	5.463	7.585	9.881	11.864	16.928	16.288
271	5.742	11.93	9.609	6.487	4.813	6.293	11.73	12.249	14.152
272	5.742	11.93	9.609	6.487	4.813	6.293	11.73	12.249	14.152
273	5.926	11.18	9.263	4.98	7.17	9.86	11.321	11.324	16.513
274	5.926	11.18	9.263	4.98	7.17	9.86	11.321	11.324	16.513
275	7.84	8.744	9.18	4.714	4.907	8.373	11.173	12.815	16.492
276	7.84	8.744	9.18	4.714	4.907	8.373	11.173	12.815	16.492
277	6.906	8.107	7.736	5.529	6.67	6.596	10.581	14.294	16.774
278	6.906	8.107	7.736	5.529	6.67	6.596	10.581	14.294	16.774
279	5.852	6.878	7.707	6.286	4.919	7.652	11.46	12.357	17.288
280	5.852	6.878	7.707	6.286	4.919	7.652	11.46	12.357	17.288
281	5.452	4.236	7.458	6.702	4.521	6.117	10.642	11.886	16.106
282	5.452	4.236	7.458	6.702	4.521	6.117	10.642	11.886	16.106
283	5.016	4.057	8.908	6.604	5.106	8.008	11.232	9.895	16.703
284	5.016	4.057	8.908	6.604	5.106	8.008	11.232	9.895	16.703
285	7.206	3.685	8.987	4.823	5.137	6.962	11.708	12.869	17.11
286	7.206	3.685	8.987	4.823	5.137	6.962	11.708	12.869	17.11
287	6.638	4.403	9.874	3.607	5.101	8.418	10.307	10.153	16.67
288	6.638	4.403	9.874	3.607	5.101	8.418	10.307	10.153	16.67
289	5.219	9.415	9.836	5.314	5.76	7.196	11.55	16.294	16.054
290	5.219	9.415	9.836	5.314	5.76	7.196	11.55	16.294	16.054
291	6.019	7.727	8.936	5.125	5.447	4.982	10.837	13.337	15.04
292	6.019	7.727	8.936	5.125	5.447	4.982	10.837	13.337	15.04
293	6.181	4.735	9.318	5.111	5.46	8.446	10.107	12.444	14.292
294	6.181	4.735	9.318	5.111	5.46	8.446	10.107	12.444	14.292
295	6.02	3.987	9.263	4.847	4.389	5.761	10.886	12.789	13.703
296	6.02	3.987	9.263	4.847	4.389	5.761	10.886	12.789	13.703
297	5.447	9.064	7.929	6.412	5.481	7.19	11.382	13.357	14.982
298	5.447	9.064	7.929	6.412	5.481	7.19	11.382	13.357	14.982
299	6.274	6.338	8.88	5.676	8.051	8.915	12.144	14.917	16.406
300	6.274	6.338	8.88	5.676	8.051	8.915	12.144	14.917	16.406
301	7.054	12.65	9.837	4.841	8.704	5.82	11.488	14.246	16.248
302	7.054	12.65	9.837	4.841	8.704	5.82	11.488	14.246	16.248
303	6.948	11.778	9.293	4.273	8.209	6.226	11.837	12.1	14.821
304	6.948	11.778	9.293	4.273	8.209	6.226	11.837	12.1	14.821
305	5.557	8.821	8.844	5.183	7.961	6.559	11.031	11.223	18.164
306	5.557	8.821	8.844	5.183	7.961	6.559	11.031	11.223	18.164
307	6.085	12.595	9.499	5.753	9.491	4.994	11.208	18.667	15.212
308	6.085	12.595	9.499	5.753	9.491	4.994	11.208	18.667	15.212
309	5.703	10.521	8.431	5.816	5.038	5.419	11.274	12.948	17.275
310	5.703	10.521	8.431	5.816	5.038	5.419	11.274	12.948	17.275
311	7.006	10.639	9.406	5.474	3.18	5.5	11.179	12.315	15.958
312	7.006	10.639	9.406	5.474	3.18	5.5	11.179	12.315	15.958
313	7.746	13.474	9.483	5.573	7.045	9.345	11.976	12.095	17.426
314	7.746	13.474	9.483	5.573	7.045	9.345	11.976	12.095	17.426
315	6.491	8.633	9.465	8.214	6.653	7.09	11.161	6.54	18.619
316	6.491	8.633	9.465	8.214	6.653	7.09	11.161	6.54	18.619
317	6.64	2.858	9.501	5.004	6.368	7.307	10.141	10.217	18.65
318	6.64	2.858	9.501	5.004	6.368	7.307	10.141	10.217	18.65
319	6.457	12.61	9.512	3.75	5.9	5.795	10.314	13.64	16.174
320	6.457	12.61	9.512	3.75	5.9	5.795	10.314	13.64	16.174
321	6.666	10.837	8.835	5.818	9.93	7.278	11.142	18.509	17.726
322	6.666	10.837	8.835	5.818	9.93	7.278	11.142	18.509	17.726
323	6.317	12.304	11.586	5.61	10.015	10.111	10.577	15.551	17.963
324	6.317	12.304	11.586	5.61	10.015	10.111	10.577	15.551	17.963
325	6.897	13.392	9.914	5.386	11.379	7.995	11.017	9.023	16.424
326	6.897	13.392	9.914	5.386	11.379	7.995	11.017	9.023	16.424
327	7.092	17.002	11.073	8.135	11.134	10.265	12.27	14.781	17.327
328	7.092	17.002	11.073	8.135	11.134	10.265	12.27	14.781	17.327
329	6.974	12.14	9.539	5.035	9.275	6.57	12.642	11.255	18.213
330	6.974	12.14	9.539	5.035	9.275	6.57	12.642	11.255	18.213
331	7.229	15.672	9.013	7.396	8.233	7.858	13.729	12.006	16.21
332	7.229	15.672	9.013	7.396	8.233	7.858	13.729	12.006	16.21
333	6.598	15.982	10.888	4.796	9.235	9.524	12.379	14.402	15.887
334	6.598	15.982	10.888	4.796	9.235	9.524	12.379	14.402	15.887
335	5.548	12.126	9.555	4.666	8.436	8.793	10.865	14.4	18.214
336	5.548	12.126	9.555	4.666	8.436	8.793	10.865	14.4	18.214
337	6.518	11.105	9.054	4.205	9.756	9.421	11.674	12.177	19.478
338	6.518	11.105	9.054	4.205	9.756	9.421	11.674	12.177	19.478
339	6.057	16.432	8.264	5.4	7.51	8.266	11.401	12.251	19.233
340	6.057	16.432	8.264	5.4	7.51	8.266	11.401	12.251	19.233
341	5.739	12.967	7.833	2.992	5.793	9.537	8.281	7.818	18.978
342	5.739	12.967	7.833	2.992	5.793	9.537	8.281	7.818	18.978
343	5.479	9.339	9.632	6.817	8.724	9.234	10.872	12.638	19.116
344	5.479	9.339	9.632	6.817	8.724	9.234	10.872	12.638	19.116
345	6.832	11.128	8.909	4.832	9.084	6.487	11.427	10.421	18.089
346	6.832	11.128	8.909	4.832	9.084	6.487	11.427	10.421	18.089
347	8.414	12.985	10.185	4.625	7.855	8.099	11.27	13.243	18.53
348	8.414	12.985	10.185	4.625	7.855	8.099	11.27	13.243	18.53
349	6.884	11.014	6.425	5.694	5.598	9.116	12.226	12.348	18.278
350	6.884	11.014	6.425	5.694	5.598	9.116	12.226	12.348	18.278
351	8.408	12.984	7.958	6.658	8.097	9.573	11.844	10.634	18.856
352	8.408	12.984	7.958	6.658	8.097	9.573	11.844	10.634	18.856
353	8.788	9.382	7.818	4.729	11.931	9.288	10.827	9.236	18.476
354	8.788	9.382	7.818	4.729	11.931	9.288	10.827	9.236	18.476
355	5.697	5.85	6.443	7.432	9.748	6.659	11.873	4.179	17.149
356	5.697	5.85	6.443	7.432	9.748	6.659	11.873	4.179	17.149
357	6.856	5.916	6.873	7.423	11	8.861	12.399	7.95	18.417
358	6.856	5.916	6.873	7.423	11	8.861	12.399	7.95	18.417
359	7.056	7.438	10.932	5.706	8.994	10.853	11.903	8.563	17.54
360	7.056	7.438	10.932	5.706	8.994	10.853	11.903	8.563	17.54
361	5.911	10.688	9.459	7.027	6.561	5.14	11.887	8.073	15.474
362	5.911	10.688	9.459	7.027	6.561	5.14	11.887	8.073	15.474
363	7.269	9.951	10.239	6.725	9.446	3.362	14.838	7.008	17.066
364	7.269	9.951	10.239	6.725	9.446	3.362	14.838	7.008	17.066
365	8.095	7.789	11.807	4.56	10.526	3.741	14.27	4.693	15.842
366	8.095	7.789	11.807	4.56	10.526	3.741	14.27	4.693	15.842
367	7.379	10.71	11.323	6.453	7.93	4.493	13.114	8.69	16.522
368	7.379	10.71	11.323	6.453	7.93	4.493	13.114	8.69	16.522
369	8.174	8.663	10.844	7.966	8.353	4.409	12.71	7.761	15.57
370	8.174	8.663	10.844	7.966	8.353	4.409	12.71	7.761	15.57
371	6.879	7.006	11.47	6.248	6.529	3.693	11.322	8.1	16.509
372	6.879	7.006	11.47	6.248	6.529	3.693	11.322	8.1	16.509
373	10.426	11.373	11.542	3.001	7.966	4.708	9.371	11.849	15.039
374	10.426	11.373	11.542	3.001	7.966	4.708	9.371	11.849	15.039
375	6.635	12.535	8.559	4.422	7.072	5.375	10.817	14.342	15.916
376	6.635	12.535	8.559	4.422	7.072	5.375	10.817	14.342	15.916
377	6.239	14.077	11.561	5.266	10.096	6.051	11.364	16.597	15.65
378	6.239	14.077	11.561	5.266	10.096	6.051	11.364	16.597	15.65
379	5.02	15.626	10.587	6.294	6.777	5.479	12.677	14.259	16.961
380	5.02	15.626	10.587	6.294	6.777	5.479	12.677	14.259	16.961
381	5.487	12.909	8.567	4.755	7.652	4.506	15.633	13.392	15.755
382	5.487	12.909	8.567	4.755	7.652	4.506	15.633	13.392	15.755
383	7.736	12.578	12.464	7.999	8.105	4.318	14.137	13.561	14.895
384	7.736	12.578	12.464	7.999	8.105	4.318	14.137	13.561	14.895
385	6.877	8.725	10.417	5.41	9.852	3.133	13.738	11.861	16.445
386	6.877	8.725	10.417	5.41	9.852	3.133	13.738	11.861	16.445
387	5.459	11.547	11.342	7.024	6.701	5.439	15.424	16.54	16.561
388	5.459	11.547	11.342	7.024	6.701	5.439	15.424	16.54	16.561
389	7.67	9.565	11.618	5.862	8.597	4.952	15.482	12.665	15.469
390	7.67	9.565	11.618	5.862	8.597	4.952	15.482	12.665	15.469
391	4.824	11.772	12.516	11.349	6.244	6.222	20.056	13.825	16.68
392	4.824	11.772	12.516	11.349	6.244	6.222	20.056	13.825	16.68
393	8.553	7.604	12.468	9.908	6.471	5.377	16.087	9.26	15.923
394	8.553	7.604	12.468	9.908	6.471	5.377	16.087	9.26	15.923
395	5.344	10.306	11.26	12.107	6.346	4.976	18.453	13.869	15.868
396	5.344	10.306	11.26	12.107	6.346	4.976	18.453	13.869	15.868
397	5.171	7.179	12.426	8.45	5.221	4.712	11.653	12.012	15.7
398	5.171	7.179	12.426	8.45	5.221	4.712	11.653	12.012	15.7
399	5.969	12.181	11.351	8.314	6.891	4.441	18.302	13.885	16.138
400	5.969	12.181	11.351	8.314	6.891	4.441	18.302	13.885	16.138
401	6.092	12.559	10.832	10.861	7.566	3.69	19.905	12.638	16.267
402	6.092	12.559	10.832	10.861	7.566	3.69	19.905	12.638	16.267
403	5.103	11.865	12.797	8.479	8.217	3.469	19.004	13.167	15.641
404	5.103	11.865	12.797	8.479	8.217	3.469	19.004	13.167	15.641
405	5.731	13.57	10.488	5.56	11.13	4.002	16.067	13.164	15.531
406	5.731	13.57	10.488	5.56	11.13	4.002	16.067	13.164	15.531
407	7.258	10.319	10.76	5.575	11.126	3.51	11.928	13.337	15.595
408	7.258	10.319	10.76	5.575	11.126	3.51	11.928	13.337	15.595
409	5.677	11.386	13.293	5.502	7.664	4.635	17.018	14.917	15.456
410	5.677	11.386	13.293	5.502	7.664	4.635	17.018	14.917	15.456
411	4.117	9.021	11.123	8.064	9.834	5.432	16.752	13.568	15.907
412	4.117	9.021	11.123	8.064	9.834	5.432	16.752	13.568	15.907
413	6.454	10.879	10.16	4.781	7.57	3.283	11.75	15.403	16.863
414	6.454	10.879	10.16	4.781	7.57	3.283	11.75	15.403	16.863
415	5.85	11.843	12.195	5.361	6.666	4.625	11.438	13.289	15.058
416	5.85	11.843	12.195	5.361	6.666	4.625	11.438	13.289	15.058
417	6.613	12.336	9.759	6.978	7.966	5.695	11.486	11.263	17.208
418	6.613	12.336	9.759	6.978	7.966	5.695	11.486	11.263	17.208
419	6.123	13.269	11.651	4.175	7.839	5.151	10.177	13.698	15.75
420	6.123	13.269	11.651	4.175	7.839	5.151	10.177	13.698	15.75
421	6.895	9.276	9.633	5.73	7.103	4.708	10.988	5	15.283
422	6.895	9.276	9.633	5.73	7.103	4.708	10.988	5	15.283
423	7.027	12.207	11.615	4.92	5.896	5.093	12.633	4.761	16.417
424	7.027	12.207	11.615	4.92	5.896	5.093	12.633	4.761	16.417
425	6.55	8.782	9.03	7.742	8.903	3.072	13.932	3.456	15.288
426	6.55	8.782	9.03	7.742	8.903	3.072	13.932	3.456	15.288
427	7.889	10.733	10.625	4.762	7.937	3.509	10.968	8.212	15.907
428	7.889	10.733	10.625	4.762	7.937	3.509	10.968	8.212	15.907
429	4.136	10.961	10.291	10.012	7.931	4.573	19.773	2.611	14.795
430	4.136	10.961	10.291	10.012	7.931	4.573	19.773	2.611	14.795
431	4.841	6.943	12.372	12.25	8.851	5.198	15.984	4.354	16.047
432	4.841	6.943	12.372	12.25	8.851	5.198	15.984	4.354	16.047
433	7.101	3.895	12.166	10.177	9.983	3.456	17.168	5.286	16.063
434	7.101	3.895	12.166	10.177	9.983	3.456	17.168	5.286	16.063
435	10.079	5.665	11.115	10.012	7.474	3.122	17.313	3.166	13.755
436	10.079	5.665	11.115	10.012	7.474	3.122	17.313	3.166	13.755
437	5.358	4.557	11.965	7.858	5.887	4.288	11.441	3.794	15.624
438	5.358	4.557	11.965	7.858	5.887	4.288	11.441	3.794	15.624
439	4.264	3.587	13.208	9.736	5.587	5.08	18.769	3.29	15.857
440	4.264	3.587	13.208	9.736	5.587	5.08	18.769	3.29	15.857
441	6.012	4.409	12.75	8.446	5.401	4.206	18.834	3.07	15.081
442	6.012	4.409	12.75	8.446	5.401	4.206	18.834	3.07	15.081
443	5.292	4.788	11.916	12.703	5.277	6.852	21.311	2.895	15.628
444	5.292	4.788	11.916	12.703	5.277	6.852	21.311	2.895	15.628
445	4.154	6.123	11.788	10.315	4.924	5.316	19.447	3.135	15.93
446	4.154	6.123	11.788	10.315	4.924	5.316	19.447	3.135	15.93
447	7.906	5.086	11.817	9.146	6.632	4.871	11.821	11.212	14.145
448	7.906	5.086	11.817	9.146	6.632	4.871	11.821	11.212	14.145
449	6.333	7.024	14.069	6.678	8.757	5.396	11.32	5.492	14.76
450	6.333	7.024	14.069	6.678	8.757	5.396	11.32	5.492	14.76
451	6.547	5.864	11.892	4.446	7.342	5.633	11.068	5.148	15.645
452	6.547	5.864	11.892	4.446	7.342	5.633	11.068	5.148	15.645
453	7.993	5.188	11.029	8.267	5.066	3.279	12.818	5.039	13.261
454	7.993	5.188	11.029	8.267	5.066	3.279	12.818	5.039	13.261
455	5.872	4.651	9.508	7.104	6.649	5.833	12.046	4.602	16.926
456	5.872	4.651	9.508	7.104	6.649	5.833	12.046	4.602	16.926
457	5.689	4.268	10.257	5.163	6.862	6.603	10.84	4.647	15.679
458	5.689	4.268	10.257	5.163	6.862	6.603	10.84	4.647	15.679
459	8.35	5.807	10.692	6.863	6.553	8.135	12.969	4.309	15.605
460	8.35	5.807	10.692	6.863	6.553	8.135	12.969	4.309	15.605
461	9.644	5.874	8.797	6.937	6.012	3.853	12.72	2.664	14.844
462	9.644	5.874	8.797	6.937	6.012	3.853	12.72	2.664	14.844
463	6.35	6.356	9.533	3.622	5.579	7.125	11.311	3.653	15.909
464	6.35	6.356	9.533	3.622	5.579	7.125	11.311	3.653	15.909
465	8.897	5.461	10.71	5.299	8.438	8.94	13	3.404	16.018
466	8.897	5.461	10.71	5.299	8.438	8.94	13	3.404	16.018
467	6.438	6.076	8.264	5.299	7.073	6.015	16.385	4.814	15.67
468	6.438	6.076	8.264	5.299	7.073	6.015	16.385	4.814	15.67
469	6.381	4.653	13.284	5.628	7.774	3.411	14.089	5.767	14.702
470	6.381	4.653	13.284	5.628	7.774	3.411	14.089	5.767	14.702
471	6.728	7.201	13.941	3.807	7.206	4.849	13.341	2.754	14.962
472	6.728	7.201	13.941	3.807	7.206	4.849	13.341	2.754	14.962
473	6.027	6.417	12.675	4.788	4.642	5.913	14.568	9.035	14.184
474	6.027	6.417	12.675	4.788	4.642	5.913	14.568	9.035	14.184
475	7.402	3.553	13.265	4.075	10.251	4.781	12.144	3.699	16.424
476	7.402	3.553	13.265	4.075	10.251	4.781	12.144	3.699	16.424
477	6.893	3.511	10.688	7.616	10.229	3.607	17.055	5.845	14.04
478	6.893	3.511	10.688	7.616	10.229	3.607	17.055	5.845	14.04
479	5.922	3.394	10.789	4.768	8.517	3.746	12.55	4.38	13.836
480	5.922	3.394	10.789	4.768	8.517	3.746	12.55	4.38	13.836
481	6.938	4.8	12.842	3.997	6.464	3.159	11.526	6.022	14.965
482	6.938	4.8	12.842	3.997	6.464	3.159	11.526	6.022	14.965
483	6.722	4.911	13.668	2.998	8.451	6.932	8.585	8.421	16.53
484	6.722	4.911	13.668	2.998	8.451	6.932	8.585	8.421	16.53
485	5.566	8.331	9.689	5.196	4.779	6.287	11.433	6.469	17.673
486	5.566	8.331	9.689	5.196	4.779	6.287	11.433	6.469	17.673
487	6.004	5.301	10.342	7.711	5.207	8.636	13.819	3.707	17.275
488	6.004	5.301	10.342	7.711	5.207	8.636	13.819	3.707	17.275
489	6.976	4.631	9.927	7.128	4.579	8.882	11.302	3.612	17.118
490	6.976	4.631	9.927	7.128	4.579	8.882	11.302	3.612	17.118
491	5.879	6.715	11.892	4.879	3.945	5.459	11.512	2.769	15.21
492	5.879	6.715	11.892	4.879	3.945	5.459	11.512	2.769	15.21
493	5.888	6.159	12.015	6.261	6.579	3.649	11.617	3.419	15.247
494	5.888	6.159	12.015	6.261	6.579	3.649	11.617	3.419	15.247
495	4.99	7.286	9.077	6.303	4.965	6.464	11.515	5.41	17.866
496	4.99	7.286	9.077	6.303	4.965	6.464	11.515	5.41	17.866
497	6.359	11.397	8.528	3.836	3.184	7.645	10.506	5.031	17.609
498	6.359	11.397	8.528	3.836	3.184	7.645	10.506	5.031	17.609
499	5.295	5.919	6.452	6.32	5.134	8.556	11.367	3.231	18.029
500	5.295	5.919	6.452	6.32	5.134	8.556	11.367	3.231	18.029
501	4.962	4.984	9.828	5.225	7.245	5.256	10.048	3.145	16.108
502	4.962	4.984	9.828	5.225	7.245	5.256	10.048	3.145	16.108
503	8.853	9.048	11.103	6.376	6.689	10.184	11.078	3.293	17.002
504	8.853	9.048	11.103	6.376	6.689	10.184	11.078	3.293	17.002
505	8.456	7.736	11.535	7.288	6.697	5.989	11.853	3.058	17.687
506	8.456	7.736	11.535	7.288	6.697	5.989	11.853	3.058	17.687
507	5.789	8.528	7.481	5.411	5.576	7.419	10.828	3.71	17.989
508	5.789	8.528	7.481	5.411	5.576	7.419	10.828	3.71	17.989
509	5.23	6.273	10.612	7.107	11.086	5.139	10.544	9.691	16.956
510	5.23	6.273	10.612	7.107	11.086	5.139	10.544	9.691	16.956
511	9.091	6.346	11.28	5.94	10.014	5.886	11.023	6.082	17.413
512	9.091	6.346	11.28	5.94	10.014	5.886	11.023	6.082	17.413
513	5.363	3.716	10.807	5.429	8.391	6.283	11.678	6.804	17.504
514	5.363	3.716	10.807	5.429	8.391	6.283	11.678	6.804	17.504
515	5.91	7.589	11.975	7.707	5.444	6.231	11.285	5.763	15.845
516	5.91	7.589	11.975	7.707	5.444	6.231	11.285	5.763	15.845
517	5.899	7.374	8.887	7.905	5.247	7.859	12.583	5.741	16.425
518	5.899	7.374	8.887	7.905	5.247	7.859	12.583	5.741	16.425
519	8.491	3.089	6.538	7.82	11.305	8.03	11.671	6.043	17.768
520	8.491	3.089	6.538	7.82	11.305	8.03	11.671	6.043	17.768
521	5.524	3.926	9.355	6.04	11.315	7.444	12.396	6.973	18.647
522	5.524	3.926	9.355	6.04	11.315	7.444	12.396	6.973	18.647
523	8.174	3.441	10.613	5.683	12.38	3.591	9.211	5.599	17.059
524	8.174	3.441	10.613	5.683	12.38	3.591	9.211	5.599	17.059
525	7.538	3.596	9.012	7.14	9.798	7.815	12.465	5.78	16.406
526	7.538	3.596	9.012	7.14	9.798	7.815	12.465	5.78	16.406
527	7.668	4.352	8.619	3.61	9.244	7.354	11.016	5.255	16.391
528	7.668	4.352	8.619	3.61	9.244	7.354	11.016	5.255	16.391
529	9.586	4.827	13.25	7.789	8.701	7.513	10.621	5.537	16.545
530	9.586	4.827	13.25	7.789	8.701	7.513	10.621	5.537	16.545
531	7.02	3.565	11.183	7.674	11.85	3.418	12.077	9.161	15.875
532	7.02	3.565	11.183	7.674	11.85	3.418	12.077	9.161	15.875
533	8.065	4.042	12.127	5.015	10.135	2.517	12.43	8.327	15.38
534	8.065	4.042	12.127	5.015	10.135	2.517	12.43	8.327	15.38
535	7.768	4.638	9.849	4.438	10.054	5.213	11.424	6.561	17.001
536	7.768	4.638	9.849	4.438	10.054	5.213	11.424	6.561	17.001
537	7.743	4.194	10.071	5.027	8.251	4.05	16.521	6.203	15.828
538	7.743	4.194	10.071	5.027	8.251	4.05	16.521	6.203	15.828
539	4.203	5.48	10.085	9.111	8.04	5.179	17.494	5.261	14.352
540	4.203	5.48	10.085	9.111	8.04	5.179	17.494	5.261	14.352
541	6.926	10.197	12.462	8.08	13.156	3.782	14.497	8.32	14.073
542	6.926	10.197	12.462	8.08	13.156	3.782	14.497	8.32	14.073
543	8.09	8.006	12.845	7.05	11.012	3.622	16.168	6.028	15.002
544	8.09	8.006	12.845	7.05	11.012	3.622	16.168	6.028	15.002
545	8.456	5.62	11.904	4.952	8.413	5.715	14.466	5.902	14.923
546	8.456	5.62	11.904	4.952	8.413	5.715	14.466	5.902	14.923
547	6.923	5.574	12.389	5.15	7.705	2.823	12.317	6.216	13.802
548	6.923	5.574	12.389	5.15	7.705	2.823	12.317	6.216	13.802
549	10.307	9.268	10.044	5.197	7.836	3.198	11.393	8.54	13.702
550	10.307	9.268	10.044	5.197	7.836	3.198	11.393	8.54	13.702
551	8.249	4.793	11.326	7.26	8.689	4.103	14.674	5.361	14.15
552	8.249	4.793	11.326	7.26	8.689	4.103	14.674	5.361	14.15
553	7.722	7.156	12.217	8.2	8.409	4.767	13.157	6.558	14.81
554	7.722	7.156	12.217	8.2	8.409	4.767	13.157	6.558	14.81
555	7.042	6.748	11.955	4.721	11.59	3.493	13.727	6.476	15.032
556	7.042	6.748	11.955	4.721	11.59	3.493	13.727	6.476	15.032
557	6.973	9.672	11.1	6.68	6.624	3.467	15.769	7.467	15.528
558	6.973	9.672	11.1	6.68	6.624	3.467	15.769	7.467	15.528
559	6.469	6.373	11.184	4.043	3.672	6.852	12.041	2.963	15.437
560	6.469	6.373	11.184	4.043	3.672	6.852	12.041	2.963	15.437
561	6.651	9.49	9.038	4.142	3.371	5.667	11.637	2.859	15.156
562	6.651	9.49	9.038	4.142	3.371	5.667	11.637	2.859	15.156
563	8.819	8.883	10.195	3.492	4.694	3.801	12.044	2.636	14.583
564	8.819	8.883	10.195	3.492	4.694	3.801	12.044	2.636	14.583
565	7.12	8.531	12.148	4.642	3.585	3.378	11.979	2.919	15.968
566	7.12	8.531	12.148	4.642	3.585	3.378	11.979	2.919	15.968
567	9.995	8.204	10.504	3.04	3.533	3.8	12.141	2.898	13.622
568	9.995	8.204	10.504	3.04	3.533	3.8	12.141	2.898	13.622
569	8.212	7.444	12.607	3.5	5.299	3.598	11.528	3.239	15.095
570	8.212	7.444	12.607	3.5	5.299	3.598	11.528	3.239	15.095
571	7.118	7.002	10.516	3.675	6.689	3.92	11.93	3.186	16.422
572	7.118	7.002	10.516	3.675	6.689	3.92	11.93	3.186	16.422
573	7.897	6.742	13.177	5.238	6.408	3.417	12.477	3.624	15.853
574	7.897	6.742	13.177	5.238	6.408	3.417	12.477	3.624	15.853
575	7.918	5.496	12.175	4.407	5.767	3.219	12.05	6.268	16.205
576	7.918	5.496	12.175	4.407	5.767	3.219	12.05	6.268	16.205
577	8.133	7.6	11.381	3.775	4.81	3.685	11.365	3.537	15.635
578	8.133	7.6	11.381	3.775	4.81	3.685	11.365	3.537	15.635
579	7.916	6.217	9.525	5.379	6.11	3.622	10.759	3.024	15.013
580	7.916	6.217	9.525	5.379	6.11	3.622	10.759	3.024	15.013
581	10.013	7.021	10.615	2.712	6.127	3.036	11.772	3.279	14.397
582	10.013	7.021	10.615	2.712	6.127	3.036	11.772	3.279	14.397
583	9.878	5.377	12.776	3.22	4.666	3.571	11.674	2.976	15.337
584	9.878	5.377	12.776	3.22	4.666	3.571	11.674	2.976	15.337
585	8.707	4.458	11.262	3.512	7.517	6.22	11.679	2.892	15.982
586	8.707	4.458	11.262	3.512	7.517	6.22	11.679	2.892	15.982
587	5.525	4.369	13.671	7.673	5.353	5.142	10.725	2.758	15.171
588	5.525	4.369	13.671	7.673	5.353	5.142	10.725	2.758	15.171
589	5.6	3.61	10.832	6.356	5.176	5.621	10.29	2.585	16.694
590	5.6	3.61	10.832	6.356	5.176	5.621	10.29	2.585	16.694
591	5.829	4.347	10.732	6.736	7.725	3.651	11.424	2.575	14.571
592	5.829	4.347	10.732	6.736	7.725	3.651	11.424	2.575	14.571
593	6.614	8.03	11.78	6.199	7.748	5.479	11.962	3.135	16.027
594	6.614	8.03	11.78	6.199	7.748	5.479	11.962	3.135	16.027
595	5.8	8.079	12.002	5.008	4.855	6.046	11.993	2.748	15.949
596	5.8	8.079	12.002	5.008	4.855	6.046	11.993	2.748	15.949
597	6.745	7.275	9.634	4.036	3.961	6.439	11.565	2.898	17.012
598	6.745	7.275	9.634	4.036	3.961	6.439	11.565	2.898	17.012
599	6.492	10.069	11.761	4.809	7.822	5.011	11.267	2.693	15.335
600	6.492	10.069	11.761	4.809	7.822	5.011	11.267	2.693	15.335
601	6.975	8.395	9.77	7.228	3.735	5.363	11.215	2.614	15.559
602	6.975	8.395	9.77	7.228	3.735	5.363	11.215	2.614	15.559
603	6.307	10.302	10.136	7.3	4.187	7.704	11.659	3.269	16.059
604	6.307	10.302	10.136	7.3	4.187	7.704	11.659	3.269	16.059
605	6.469	7.03	10.691	4.973	5.166	7.885	10.855	3.143	17.141
606	6.469	7.03	10.691	4.973	5.166	7.885	10.855	3.143	17.141
607	6.939	5.711	11.651	5.187	6.27	12.006	10.001	3.036	13.429
608	6.939	5.711	11.651	5.187	6.27	12.006	10.001	3.036	13.429
609	9.339	7.657	12.02	5.462	4.915	5.895	10.336	2.776	15.384
610	9.339	7.657	12.02	5.462	4.915	5.895	10.336	2.776	15.384
611	6.469	5.485	12.037	5.09	5.698	3.518	11.26	3.691	13.847
612	6.469	5.485	12.037	5.09	5.698	3.518	11.26	3.691	13.847
613	8.719	8.051	11.091	6.612	6.18	3.288	11.472	3.297	13.99
614	8.719	8.051	11.091	6.612	6.18	3.288	11.472	3.297	13.99
615	5.864	6.471	11.275	7.326	5.743	9.036	12.922	3.241	15.546
616	5.864	6.471	11.275	7.326	5.743	9.036	12.922	3.241	15.546
617	5.688	3.316	11.69	5.834	5.833	8.208	11.257	3.866	15.441
618	5.688	3.316	11.69	5.834	5.833	8.208	11.257	3.866	15.441
619	5.513	6.734	10.258	6.454	5.847	7.111	11.284	3.269	16.592
620	5.513	6.734	10.258	6.454	5.847	7.111	11.284	3.269	16.592
621	5.821	6.556	11.542	6.119	3.768	9.179	11.269	2.578	16.254
622	5.821	6.556	11.542	6.119	3.768	9.179	11.269	2.578	16.254
623	6.06	8.996	10.797	6.343	4.583	8.636	11.656	3.658	15.48
624	6.06	8.996	10.797	6.343	4.583	8.636	11.656	3.658	15.48
625	6.232	8.437	12.018	5.553	5.174	7.727	11.266	3.43	16.054
626	6.232	8.437	12.018	5.553	5.174	7.727	11.266	3.43	16.054
627	6.059	5.586	9.678	5.953	4.596	7.025	10.758	3.369	15.553
628	6.059	5.586	9.678	5.953	4.596	7.025	10.758	3.369	15.553
629	5.825	6.171	9.79	6.31	6.268	4.511	11.993	3.632	15.116
630	5.825	6.171	9.79	6.31	6.268	4.511	11.993	3.632	15.116
631	5.402	4.403	9.421	7.062	5.199	6.972	11.159	3.654	15.846
632	5.402	4.403	9.421	7.062	5.199	6.972	11.159	3.654	15.846
633	5.671	4.467	10.36	7.057	5.909	3.514	11.823	3.5	13.663
634	5.671	4.467	10.36	7.057	5.909	3.514	11.823	3.5	13.663
635	5.279	9.491	8.754	7.333	12.487	9.397	11.109	3.353	14.267
636	5.279	9.491	8.754	7.333	12.487	9.397	11.109	3.353	14.267
637	6.518	8.246	12.477	4.502	6.255	5.603	10.498	3.571	17.102
638	6.518	8.246	12.477	4.502	6.255	5.603	10.498	3.571	17.102
639	6.724	6.584	12.454	3.309	6.299	9.617	9.854	3.369	15.25
640	6.724	6.584	12.454	3.309	6.299	9.617	9.854	3.369	15.25
641	6.202	6.837	12.709	5.071	6.371	9.497	10.662	3.568	15.179
642	6.202	6.837	12.709	5.071	6.371	9.497	10.662	3.568	15.179
643	5.847	10.704	12.829	5.232	8.431	8.018	11.461	6.244	16.112
644	5.847	10.704	12.829	5.232	8.431	8.018	11.461	6.244	16.112
645	5.152	7.908	13.613	5.406	6.573	8.162	10.963	7.073	15.987
646	5.152	7.908	13.613	5.406	6.573	8.162	10.963	7.073	15.987
647	5.73	8.588	11.359	5.601	8.27	9.805	10.658	8.314	14.848
648	5.73	8.588	11.359	5.601	8.27	9.805	10.658	8.314	14.848
649	6.476	9.998	11.65	4.641	4.091	5.826	10.303	8.891	15.181
650	6.476	9.998	11.65	4.641	4.091	5.826	10.303	8.891	15.181
651	7.079	5.196	11.115	5.34	7.155	8.381	11.022	7.47	15.363
652	7.079	5.196	11.115	5.34	7.155	8.381	11.022	7.47	15.363
653	6.65	8.288	10.662	5.05	4.934	6.04	11.781	7.879	15.678
654	6.65	8.288	10.662	5.05	4.934	6.04	11.781	7.879	15.678
655	5.597	8.092	11.373	7.262	6.317	5.801	10.032	7.594	15.194
656	5.597	8.092	11.373	7.262	6.317	5.801	10.032	7.594	15.194
657	6.947	7.201	10.98	6.323	4.915	6.661	11.818	9.949	16.504
658	6.947	7.201	10.98	6.323	4.915	6.661	11.818	9.949	16.504
659	10.244	3.563	11.592	4.26	9.598	6.592	11.429	3.311	15.101
660	10.244	3.563	11.592	4.26	9.598	6.592	11.429	3.311	15.101
661	7.754	9.834	10.681	5.876	6.822	7.664	12.036	6.858	14.732
662	7.754	9.834	10.681	5.876	6.822	7.664	12.036	6.858	14.732
663	7.535	7.894	11.963	8.066	5.976	4.491	12.281	3.083	15.674
664	7.535	7.894	11.963	8.066	5.976	4.491	12.281	3.083	15.674
665	7.923	4.117	11.326	5.078	8.815	7.449	10.764	3.716	16.637
666	7.923	4.117	11.326	5.078	8.815	7.449	10.764	3.716	16.637
667	5.827	5.431	10.689	4.7	10.107	9.215	10.796	2.976	16.072
668	5.827	5.431	10.689	4.7	10.107	9.215	10.796	2.976	16.072
669	5.982	7.213	10.655	4.413	11.638	6.423	10.665	5.629	16.216
670	5.982	7.213	10.655	4.413	11.638	6.423	10.665	5.629	16.216
671	6.251	6.665	9.95	4.73	10.915	6.503	10.322	3.353	16
672	6.251	6.665	9.95	4.73	10.915	6.503	10.322	3.353	16
673	6.828	7.145	12.265	4.723	7.46	8.841	10.719	2.751	14.53
674	6.828	7.145	12.265	4.723	7.46	8.841	10.719	2.751	14.53
675	5.387	6.388	10.983	7.277	8.678	6.994	11.605	3.422	14.814
676	5.387	6.388	10.983	7.277	8.678	6.994	11.605	3.422	14.814
677	5.947	10.973	11.018	6.807	10.901	9.245	12.315	3.579	15.76
678	5.947	10.973	11.018	6.807	10.901	9.245	12.315	3.579	15.76
679	5.474	8.945	9.73	7.704	6.961	5.319	11.801	3.647	15.8
680	5.474	8.945	9.73	7.704	6.961	5.319	11.801	3.647	15.8
681	5.266	6.722	9.62	3.752	6.878	5.945	9.899	3.566	15.719
682	5.266	6.722	9.62	3.752	6.878	5.945	9.899	3.566	15.719
683	5.053	6.872	9.265	5.955	7.713	5.547	11.592	3.646	16.764
684	5.053	6.872	9.265	5.955	7.713	5.547	11.592	3.646	16.764
685	7.837	7.603	9.396	8.454	6.347	5.924	11.911	6.75	15.642
686	7.837	7.603	9.396	8.454	6.347	5.924	11.911	6.75	15.642
687	6.596	11.964	11.16	8.171	4.671	7.025	11.725	2.903	16.752
688	6.596	11.964	11.16	8.171	4.671	7.025	11.725	2.903	16.752
689	8.685	10.043	9.029	7.648	5.773	6.094	11.335	3.125	14.556
690	8.685	10.043	9.029	7.648	5.773	6.094	11.335	3.125	14.556
691	5.819	10.688	11.012	6.516	5.44	3.711	11.165	3.133	15.292
692	5.819	10.688	11.012	6.516	5.44	3.711	11.165	3.133	15.292
693	5.627	10.862	11.38	6.519	8.211	3.425	11.079	5.344	15.039
694	5.627	10.862	11.38	6.519	8.211	3.425	11.079	5.344	15.039
695	6.032	9.925	11.335	7.133	12.51	3.634	11.551	3.547	13.88
696	6.032	9.925	11.335	7.133	12.51	3.634	11.551	3.547	13.88
697	4.789	12.951	12.073	4.754	5.368	3.576	11.507	3.411	14.57
698	4.789	12.951	12.073	4.754	5.368	3.576	11.507	3.411	14.57
699	5.268	8.619	11.153	5.472	6.871	3.527	10.851	3.894	15.18
700	5.268	8.619	11.153	5.472	6.871	3.527	10.851	3.894	15.18
701	4.861	7.988	10.989	5.197	8.685	6.955	11.108	2.802	12.712
702	4.861	7.988	10.989	5.197	8.685	6.955	11.108	2.802	12.712
703	5.809	3.214	9.667	5.021	9.171	7.894	10.904	3.68	14.096
704	5.809	3.214	9.667	5.021	9.171	7.894	10.904	3.68	14.096
705	6.328	4.181	10.503	4.682	9.25	7.687	11.37	3.116	14.741
706	6.328	4.181	10.503	4.682	9.25	7.687	11.37	3.116	14.741
707	6.089	10.511	9.638	5.261	14.521	7.581	11.227	2.935	14.793
708	6.089	10.511	9.638	5.261	14.521	7.581	11.227	2.935	14.793
709	5.981	6.451	9.427	6.123	11.9	6.39	11.398	3.696	14.829
710	5.981	6.451	9.427	6.123	11.9	6.39	11.398	3.696	14.829
711	6.024	10.262	9.319	4.62	13.62	6.763	11.174	3.361	14.132
712	6.024	10.262	9.319	4.62	13.62	6.763	11.174	3.361	14.132
713	6.266	6.541	10.872	4.706	10.812	5.427	10.758	3.773	14.2
714	6.266	6.541	10.872	4.706	10.812	5.427	10.758	3.773	14.2
715	7.138	8.586	11.177	3.985	9.824	8.018	11.248	3.748	14.193
716	7.138	8.586	11.177	3.985	9.824	8.018	11.248	3.748	14.193
717	12.874	7.297	9.799	7.179	6.41	4.473	10.392	2.585	13.969
718	12.874	7.297	9.799	7.179	6.41	4.473	10.392	2.585	13.969
719	11.704	8.122	10.764	8.335	9.478	5.584	11.138	3.524	14.678
720	11.704	8.122	10.764	8.335	9.478	5.584	11.138	3.524	14.678
721	5.741	11.888	11.682	5.057	8.734	8.826	11.402	3.268	13.996
722	5.741	11.888	11.682	5.057	8.734	8.826	11.402	3.268	13.996
723	5.668	5.518	10.515	5.03	8.349	3.246	11.148	2.669	12.313
724	5.668	5.518	10.515	5.03	8.349	3.246	11.148	2.669	12.313
725	5.164	9.088	12.981	5.159	5.859	2.883	9.708	2.629	11.293
726	5.164	9.088	12.981	5.159	5.859	2.883	9.708	2.629	11.293
727	4.817	11.339	10.796	5.279	6.864	5.508	10.212	2.442	16.488
728	4.817	11.339	10.796	5.279	6.864	5.508	10.212	2.442	16.488
729	4.153	7.989	12.38	6.062	7.529	3.468	10.642	3.261	11.87
730	4.153	7.989	12.38	6.062	7.529	3.468	10.642	3.261	11.87
731	5.114	7.495	11.873	5.473	5.29	3.554	10.388	2.507	13.748
732	5.114	7.495	11.873	5.473	5.29	3.554	10.388	2.507	13.748
733	5.384	9.763	13.192	5.576	7.386	3.733	10.356	2.794	11.828
734	5.384	9.763	13.192	5.576	7.386	3.733	10.356	2.794	11.828
735	5.426	7.039	13.047	5.318	6.431	3.658	11.092	2.677	15.233
736	5.426	7.039	13.047	5.318	6.431	3.658	11.092	2.677	15.233
737	6.332	4.418	10.259	4.91	8.562	3.213	10.64	3.348	13.551
738	6.332	4.418	10.259	4.91	8.562	3.213	10.64	3.348	13.551
